# Supplementary material for: Sea ice volume variability and water temperature in the Greenland Sea
Source: Copernicus journal article supplement (doi:10.5194/tc-2019-117), 2019-06-26
Supplement: Supplementary file [file tc-2019-117-AC6-supplement.pdf]

# Sea ice volume variability and water temperature in the Greenland Sea

Valeria Selyuzhenok<sup>1,2</sup>, Igor Bashmachnikov<sup>1,2</sup>, Robert Ricker<sup>3</sup>, Anna Vesman<sup>1,2,4</sup>, and Leonid Bobylev<sup>1</sup>

<sup>1</sup>Nansen International Environmental and Remote Sensing Centre, 14 Line V.O., 7, St.Petersburg, 199034, Russia

<sup>2</sup>the St. Petersburg State University, Department of Oceanography, 10 Line V.O, 33, St.Petersburg, 199034, Russia

<sup>3</sup>Alfred-Wegener-Institut, Helmholtz-Zentrum für Polar- und Meeresforschung, Klummannstr., 3d, Bremerhaven, 27570, Germany

<sup>4</sup>Arctic and Antarctic Research Institute, Bering str., 38, St.Petersburg, 199397, Russia

**Correspondence:** Valeria Selyuzhenok (valeria.selyuzhenok@niersc.spb.ru)

**Abstract.** This study explores a link between the long-term variations in the integral sea ice volume (SIV) in the Greenland Sea and oceanic processes. Using Pan-Arctic Ice Ocean Modelling and Assimilation System (PIOMAS, 1979-2016), we show that ~~the negative tendencies in SIV go~~ loss of sea ice volume (SIV) in the region goes in parallel with the increasing ~~ice-sea ice volume~~ flux through the Fram Strait. The overall SIV loss in the Greenland Sea comprises 113 km<sup>3</sup> per decade, while the total SIV import through the Fram ~~strait is increasing~~ Strait increases by 115 km<sup>3</sup> per decade. An analysis of the ocean temperature and the mixed layer depth (MLD) in the marginal sea ice zone (MIZ), based on ARMOR data-set (1993-2016), revealed doubling of the amount of the upper ocean heat content available for the sea ice melt in the MIZ. This increase in the upper ocean heat content over the 24-year period can solely explain the SIV loss in the Greenland Sea, even when accounting for the increasing SIV flux from the Arctic. The increase in the ocean heat content is found to be linked to an increase in the temperature of the Atlantic ~~water~~ Water in the Nordic ~~seas~~ Seas, following an increase of ocean heat flux from the subtropical North Atlantic. We argue that the predominantly positive North Atlantic Oscillation (NAO) index during the four recent decades, together with the intensification of the deep convection in the Greenland Sea, are responsible for the overall intensification of the circulation in the Nordic ~~seas~~ Seas, which explains the observed long-term variations of the SIV.

*Copyright statement.* TEXT

## 15 1 Introduction

The Greenland Sea is one of the key regions of deep ocean convection (Visbeck et al., 1995; Marshall and Schott, 1999; Brakstad et al., 2011) an inherent part of the Atlantic Meridional Overturning Circulation (AMOC). ~~The 2/3~~ More than half of the deep AMOC water ~~is formed in this region~~ (Rhein et al., 2011; Buckley and Marshall, 2016) originated from the Greenland Sea (Yashayaev, 2007; Rhein et al., 2011). In turn, the intensity of convection is governed by buoyancy (heat and freshwater) fluxes at the ocean-atmosphere boundary, as well as oceanic buoyancy advection ~~to the sea~~ into the region. The freshwater is thought to play the principal role in long-term

buoyancy balance of the upper Greenland Sea (Meincke et al., 1992; Alekseev et al., 2001a). The positive local precipitation-  
evaporation exchange accounts for only 15% of the freshwater balance in the Nordic Seas. Approximately half of the fresh  
water anomaly in the ~~Norwegian-Greenland region~~ Nordic Seas originates from the freshwater flux through the Fram Strait,  
which ~~is formed~~ forms by freshening of the upper ocean due to ~~sea-ice~~ sea ice melt in the Arctic ~~basin~~ Ocean and by solid ~~ice~~  
5 ~~transport~~ sea ice transport melting outside the Arctic Ocean (Serreze et al., 2006; Peterson et al., 2006; Glessmer et al., 2014).

A general surface circulation in the region is shown in Fig.1a. The upper 500 m in the western Greenland Sea is formed  
by mixing the Polar Water (PW) with temperature, close to freezing and salinity from 33 to 34 and the Atlantic Water (AW) with  
temperature over 3 °C and salinity around 34.9 recirculating in the southern part of the Fram Strait (Moretskij and Popov, 1989; Langehaug  
The maximum PW content quickly decreasing in the off shelf direction is found in the upper 200 m of the Greenland shelf  
10 (Håvik et al., 2017). The AW is found below the PW. Its core is observed in the seawards branch of the EGC, trapped  
by the continental slope. The central parts of the Greenland Sea represents a mixture of the AW and the PW with the  
Greenland Intermediate Water (with temperature -0.4 – -0.8 °C and salinity ~34.9). The core of the Greenland Intermediate  
Water is found at 500-1000 m. The Greenland Sea Deep Water (with temperature -0.8 – -1.2 °C and salinity ~34.9) is  
found below 1000 m. The latter two water masses are formed by advection of the intermediate and deep water, coming  
15 from the Arctic Eurasian basin through the Fram Strait, mixed with the recirculating Atlantic Water by winter convection  
(Moretskij and Popov, 1989; Alekseev et al., 1989; Langehaug and Falck, 2012). The convection depth in the Greenland Sea  
often exceeds 2000 m (Latarius and Quadfasel, 2016; Bashmachnikov et al., 2019).

The sea ice conditions in the Greenland Sea are defined by ~~sea-ice~~ sea ice import through the Fram Strait and by local  
ice formation and melt. The Fram Strait sea ice ~~flux~~ area (Vinje and Finnekåsa, 1986; Kwok et al., 2004) and volume flux  
20 (Kwok et al., 2004; Ricker et al., 2018) is primarily controlled by variations in the sea ice drift, which, in turn, are driven  
by the large-atmospheric circulation patterns (~~Vinje and Finnekåsa, 1986; Kwok et al., 2004; Ricker et al., 2018~~). Most of the  
variability of the atmospheric circulation and drift patterns is captured by the phase of the Arctic Oscillation (AO) or of its  
regional counterpart – the North Atlantic Oscillation (NAO) (Marshall et al., 2001). The positive AO (or NAO) phase intensifies  
~~northern~~ northerly winds that drives more intensive ice transport through the Fram Strait (Kwok et al., 2004). ~~When~~ There is a  
25 moderate correlation (0.62) between between NAO index (excluding extreme negative NAO events, ~~the correlation coefficient  
between NAO and~~) and winter sea ice area flux through the Fram Strait (~~over 24 years of satellite observations~~) reaches  
0.6 Kwok et al. (2004), while that with the (1978-2002) (Kwok et al., 2004). A higher correlation (0.70) between NAO index  
and winter sea ice volume flux vary from 0.4 (~~over 9 years of mooring observations, 1991-1998; Kwok et al. (2004))~~) to 0.7  
(over 7 years of CryoSat-2 satellite observations, (2010-2017; Ricker et al. (2018))) is reported by Ricker et al. (2018). It is  
30 also argued that the interannual variations of the sea ice area flux through the Fram Strait is even stronger linked to the Arctic  
Dipole pattern, that explains a higher fraction of the observed interannual variations in the ~~sea-ice~~ sea ice area flux than either  
the AO or the NAO (~~Wu et al., 2006~~) (Wu et al., 2006). The Arctic Dipole pattern is derived as the second sea-level pressure  
EOF over the Arctic, which has two centers of action: over the Laptev-Kara seas and over the Canadian Archipelago. The  
pattern represents an important mechanism regulating the ice export through Fram Strait (Wu et al., 2006).

The sea ice production in the Greenland Sea ~~primarily takes place~~ takes place east of the shelf between 71-75 °N ~~, where~~ the and north of 75 °N within the highly dynamic pack ice transported southwards along the Greenland coast. The latter fills in cracks and leads and can reach considerable thickness. While the sea ice forming east of the shelf is mainly thin newly-formed ice. The highest interannual variations of sea ice area is observed between 71-75 °N (Germe et al., 2011). In the region ~~, the~~ the Odden sea ice tongue is occasionally formed, ~~an a sea~~ ice pattern extending ~~westwards eastwards~~ from the east Greenland shelf and northwest of Jan Mayen (Wadhams et al., 1996; Comiso et al., 2001). The regression of the first empirical orthogonal function (EOF) of the sea ice extent to sea-level pressure shows a weak inverse relation with the NAO-like pattern with correlation coefficient -0.4. ~~Further regression analysis suggests that decrease of the intensity~~ During the negative NAO phase, a reduction of the northerly ~~winds favours a larger area of the Odden sea ice~~ wind, permits a more intensive westward Ekman drift of sea ice into the Greenland Sea interior which favours formation of large Odden tongue (Shuchman et al., 1998; Germe et al., 2011). The Odden tongue area ~~also strongly negatively correlates~~ shows a strong negative correlation with the air temperature (-0.7) over Jan Mayen and with the local sea surface temperature (-0.9) (Comiso et al., 2001). Having stronger correlations with water temperature, the negative correlation of the sea ice area with the air temperature might be an artifact, as both are oppositely affected by the oceanic heat release to the atmosphere (Germe et al., 2011).

The ocean clearly plays an important role in the sea ice formation and melt in the region. In particular, it is speculated that the oceanic convection in the region favours a more intensive warm water flux from the south, affecting the air temperature and the sea ice extent (Visbeck et al., 1995). However, presently there is a lack of investigation linking oceanic processes with the sea ice variability in the Greenland Sea (Comiso et al., 2001; Kern et al., 2010).

Both sea ice area flux through the Fram Strait and local sea ice processes in the Greenland Sea ~~reveal~~ show changes over the recent decades. ~~An~~ The overall reduction in sea ice extent is observed in the region since 1979 (Moore et al., 2015; Onarheim et al., 2018). Since 2000s, a reduction in winter sea ice area is observed in the region of Odden ice tongue formation (Rogers and Hung, 2008; Kern et al., 2010). Concurrently, an increase of the sea ice area flux through the Fram Strait since 1979 was reported by Kwok et al. (2004); Smedsrud et al. (2017). ~~Shorter~~ A combined time series of of sea ice volume flux through the Fram Strait ~~showed no significant changes (Kwok et al., 2004; Spreen et al., 2009; Ricker et al., 2018). At the same time, since 2000s, a reduction in winter sea ice area has been detected in the Greenland Sea (in particular in the Oddin ice tongue) from passive microwave observations (Rogers and Hung, 2008; Kern et al., 2010; Germe et al., 2011)~~ (1990-1996 (Vinje et al., 1998), 1991-1999 (Kwok et al., 2004) and 2003-2008 (Spreen et al., 2009)) shows a shift towards lower fluxes in early 2000s compared to 1990s (Spreen et al., 2009). However, the later study of Ricker et al. (2018) revealed that the sea ice volume flux in 2010-2017 is similar to that in 1990s. Due to different uncertainties in the data and different methodologies used in those studies, it not possible to merge the results to get an uninterrupted data-set for the entire period from 1990 to 2017. Although individual studies do not reveal significant trends in the sea ice volume flux through the Fram Strait, the overall tendency remains unknown.

In this paper we further explore a link between sea ice volume variability in the Greenland Sea and oceanic processes. The first objective is to estimate the sea ice mass balance in the Greenland Sea from local sea ice formation/melt and from sea ice advection in/out of the sea. We extend this analysis back to 1979 using the PIOMAS sea ice volume data. Further, we link the

detected variations of [sea ice mass balance](#) to heat flux of the ~~Atlantic water into the region~~ [AW](#) with the West Spitsbergen current (WSC) [into the region](#).

## 2 Data

### 2.1 PIOMAS sea ice volume

5 PIOMAS (Pan-Arctic Ice Ocean Modeling and Assimilation System) is a coupled sea ice-ocean model developed to simulate Arctic sea ice volume. It assimilates NSIDC (National Snow and Ice Data Center) near-real time sea [daily](#) ice concentration, [daily surface atmospheric forcing and the sea-surface temperature in the ice-free areas from](#) NCEP (National Centers for Environmental Prediction)/NCAR (National Center for Atmospheric Research) ~~atmospheric parameters and the sea-surface temperature in the ice-free areas (Zhang and Rothrock, 2003)~~ [reanalysis \(Zhang and Rothrock, 2003; Schweiger et al., 2011\)](#).

10 The PIOMAS provides monthly effective sea ice thickness (mean sea ice thickness over a grid cell) on a curvilinear model grid from 1978. A comparison of PIOMAS effective sea ice thickness with in situ, submarine and ICESat [satellite](#) (Ice, Cloud, and land Elevation Satellite) data, mainly covering the western Arctic, showed that the PIOMAS uncertainty for monthly mean effective sea ice thickness does not exceed 0.78 m (Schweiger et al., 2011). ~~Although, the model tends to overestimate the thickness of the thin ice and underestimate the thickness of the thick ice, the spatial patterns~~ [The spatial pattern](#) of PIOMAS ice

15 thickness agrees well with those ~~derived~~ [derived](#) from in situ and satellite data. [The model overestimates the thickness of thin ice and underestimates the thickness of thick ice. Such systematic differences might affect long-term trends in thickness and volume. There is an indication that the PIOMAS shows a conservative sea ice volume trend \(1979-2010\) \(Schweiger et al., 2011\)](#).

Since PIOMAS performance has not been ~~accessed~~ [assessed](#) south of the Fram Strait, the first part of this study is devoted to ~~cross-validation inter-comparison~~ [of the PIOMAS sea ice thickness in the Greenland Sea with satellite data, as well as](#)

20 ~~of the PIOMAS sea ice volume flux through the Fram Strait with satellite and upward-looking sonar (ULS) observations~~ [observation-based flux values known from literature](#) (Sect. 4.1 and 4.2). ~~PIOMAS data were~~ [The original monthly PIOMAS sea ice thickness data were gridded to 25 km EASE-2 grid. The PIOMAS data were](#) further used to derive time series of [monthly](#) mean annual (September-August), mean winter (October-April) and mean summer (May-September) sea ice volume in the Greenland Sea for 1979 – 2016. The grid cell sea ice volume was computed as a product of PIOMAS effective [sea](#) ice

25 thickness and the grid cell area.

### 2.2 AWI Cryosat-2 sea ice thickness

In the Greenland Sea [The](#) PIOMAS effective sea ice thickness was ~~cross-validated inter-compared~~ [against sea ice thickness from Cryosat-2 satellite data-set \(CS2, version 1.2, Grosfeld et al. \(2016\) Ricker et al. \(2014\); Hendricks et al. \(2016\)\) for the Greenland Sea region \(see green box in Fig. 1\)](#). The CS2 data-set ~~provide~~ [provides](#) monthly average sea ice thickness [on](#)

30 [EASE-2 grid](#) with 25x25 km spatial resolution from 2010 to 2017. Due to limitations of ice thickness retrieval from satellite altimetry, CS2 data-set used was limited only to the cold season (October-April). The sea ice concentration data, provided

along with CS2 thicknesses, was used to derive the effective sea ice thickness ( $H_{eff}$ ) for the comparison with the PIOMAS data. The conversion was performed for each grid cell:

$$H_{eff} = H_i * SIC_i / C \quad (1)$$

where  $H_i$  – CS2 sea ice thickness in the  $i$ -th grid cell,  $SIC_i$ ,  $C$  - sea ice concentration in the same cell.

- 5 Uncertainties of CS2 ice thickness increase below 78°N due to sparse orbit coverage (Ricker et al., 2014). The CS2 retrieval is based on sea ice freeboard measurements that are converted into sea ice thickness assuming hydrostatic equilibrium. Estimates of snow depth, required for the conversion, are based on the modified Warren climatology (Warren et al., 1999; Ricker et al., 2014). This climatology is not defined in the Fram Strait or Greenland Sea, therefore, snow depth estimates are extrapolated. Moreover, interannual variability in snow depth is not captured by the climatology, which can potentially cause biases in the final sea ice
- 10 thickness retrieval. In addition, high drift speeds can also cause biases in the ice thickness retrieval due to the timeliness of the satellite passes within one month. The typical uncertainty is in the range of 0.3 - 0.5 m, but may potentially reach higher values.

### 2.3 ARMOR data-set

- The long-term time series of water temperature at different depth levels and the mixed layer depth (MLD) were derived from
- 15 the ARMOR data-set (<http://marine.copernicus.eu/>, 1993-2015). The data-set combines in situ temperature and salinity profiles with satellite observations and is constructed as the following. First, based on a joint analysis of the variations of satellite-derived anomalies (sea-surface temperature and sea-level from satellite altimetry) and of in situ thermohaline characteristics at different depth, linear multiple regressions are obtained. The regressions allow extrapolating satellite data from the sea-surface to standard oceanographic depth levels in a regular mesh of 1/4° x 1/4°, constructing the so-called "synthetic" vertical
- 20 temperature and salinity profiles. The final monthly mean 3D temperature/salinity distributions are obtained through optimal interpolation of all ~~observed in situ~~ in situ observations for this month together with the derived "synthetic" profiles, taken with different weights (Guinehut et al., 2012). Use of satellite information provides a more precise and detailed picture of spatial and temporal variability of the thermohaline characteristics than from interpolation of in situ profiles alone (as, for example, it is done in the World Ocean Atlas data-set, [https://www.nodc.noaa.gov/OC5/WOD/pr\\_wod.html](https://www.nodc.noaa.gov/OC5/WOD/pr_wod.html)). The ~~computed vertical density profiles and the altimetry sea-surface currents were further used in~~ oceanic heat fluxes are estimated using currents
- 25 from the ARMOR data-set for deriving with the same spatial and temporal resolution. The current velocities at various depth levels are obtained by extrapolating the sea-surface current from the satellite altimetry, downwards using the thermal wind relations. The vertical density profiles, used for the computations, are assessed from the previously obtained temperature and salinity profiles (Mulet et al., 2012).

- 30 **2.4 ~~Water~~ Long timeseries of water temperature of the West Spitsbergen ~~current~~ Current**

~~Water temperatures were collected from the~~ Long-term monthly gridded water temperatures were obtained from “The Climatological Atlas of the Nordic Seas and Northern North Atlantic” (Korablev et al., 2007). The data-base merges together data from ICES (International Counsel for Exploration of the Sea) ~~and, from~~ IMR (Institute of the Marine Research) ~~data, data,~~ from a number of international projects (ESOP, VEINS, TRACTOR, CONVECTION, etc.), as well as from Soviet Union cruises in the study region. ~~The temperature time series, used in this paper, were obtained in the core of the WSC~~ However, there are too few observations in the EGC before the 2000s. In this paper we use long-term temperature time series in the much better sampled upper WSC (West Spitsbergen current) at 78°N (~~west of East Fjord, west of East Fjord~~ (Fig. 1b)). The ~~data were~~ depth averaged water temperature at 100-200 m is used, as this layer is dominated by the AW and it is not directly affected by heat exchange with the atmosphere all year round. This results in the highest temperature at these depths during cold season. Even ~~this region was~~ sampled in a ~~quite quite~~ irregular manner, with a ~~particular low lower~~ sampling frequency in winter. Since 1979, the average number of samples was 161 per year, varying from, on average, 2-5 per year from November to May to 20-35 per year from June to October. The data-gaps ~~were filled in the time series were filled in~~ by kriging with the 30-km window. The interannual variations ~~used presented~~ in this study were averaged ~~from June to September—over~~ the months the most densely covered with data (June to September).

### 3 Methods

#### 3.1 Fram Strait and Denmark Strait sea ice volume flux from PIOMAS

The sea ice volume flux through the Fram Strait was calculated as a product of monthly average PIOMAS effective sea ice thickness, area of the grid cell and the sea ice drift velocity (Ricker et al., 2018). ~~Note, that the PIOMAS sea ice thickness represents the mean thickness over a grid cell, called effective sea ice thickness (with zero sea ice thickness for the open water)~~ The sea ice drift data was taken from the Polar Pathfinder Sea Ice Motion Vectors data set (version 3), distributed by the National Snow and Ice Data Center (NSIDC) (Tschudi and Maslanik., 2016). The data is provided on EASE-2 grid with 25x25 km spatial resolution. The gate was selected as a combination of a meridional section (82°N and 12°W - 20°E) and a zonal section (20°E and 80.5°N - 82°N), as suggested by Krumpen et al. 2016. (Fig. 1a). The location of the meridional gate at 82°N was chosen to reduce biases and errors in sea ice drift that become larger with increasing velocities south of the gate (Sumata et al., 2014, 2015). The meridional and zonal sea ice volume flux,  $Q_v$  and  $Q_u$  correspondingly, were computed as:

$$Q_v = l / \cos(\lambda) * \underline{H} * \underline{H} (D_x \sin(\lambda) - D_y \cos(\lambda)) \quad (2)$$

$$Q_u = l / \cos(\lambda) * \underline{H} * \underline{H} (D_x \cos(\lambda) - D_y \sin(\lambda)) \quad (3)$$

where  $l = 25$  km is the distance between 2 data-points,  $H$  is the PIOMAS effective sea ice thickness and  $D_x$ ,  $D_y$  represents sea ice drift velocity in  $x$  and  $y$  directions of the grid, respectively, and  $\lambda$  is the longitude of the respective grid cell. ~~The total~~

The total sea ice volume flux through the Fram Strait ( $QF$ , positive – into the Greenland Sea) was obtained as a sum of the meridional and zonal fluxes along the gate:

$$QF = Q_u + Q_v \quad (4)$$

The total sea ice volume flux through the Fram Strait was derived for the period from 1979 to 2017 for each month. A similar methodology was used to assess the sea ice volume flux through the Denmark Strait ( $QD$ ) along the meridional section ( $66^\circ\text{N}$  and  $2535^\circ\text{W} - 3620^\circ\text{E}$ ). The positive sign of  $QD$  corresponds to the sea ice volume outflow from the Greenland Sea.

In order to access the data quality, the resultant sea ice volume fluxes through the Fram Strait gate at  $82^\circ\text{N}$  were cross-validated against available satellite-based inter-compared against available observation-based estimates in the Fram Strait from Kwok et al. (2004); Spreen et al. (2009); Ricker et al. (2018) (Kwok et al., 2004; Spreen et al., 2009; Ricker et al., 2018). The gate and the methodology used here was/were adopted from Ricker et al. (2018), while in the other two studies somewhat different methodologies and gates locations (Fig. 1a) were used. Each of the studies also is/is also based on different data-set data-sets of sea ice concentration (SIC), thickness (SIT) and drift (SID) (Table 1).

### 3.2 Greenland Sea sea ice mass balance

In order to analyse the sea ice volume lost or formed due to thermodynamically within the Greenland Sea gained due to local melt or freezing, we calculated the sea ice mass balance (MB) in the Greenland Sea. It was derived for each month from 1979 to 2016 as:

$$MB = (QF_m - QDV_m - V_{(m-1)})t - (VQF_m - QD_m - V_{(m-1)})t \quad (5)$$

where  $V_m$  and  $V_{(m-1)}$  are regional sea ice volume of the current  $m$ -th and previous  $(m-1)$ -th months,  $QF_m$  and  $QD_m$  are Fram Strait and Denmark Strait sea ice volume flux of the current  $m$ -th month. Therefore, positive MB values correspond to sea ice melt and negative values correspond to sea ice formation within,  $t$  - time period equal to 1 month. The regional sea ice volume was calculated for the area limited by  $82^\circ\text{N}$  and  $66^\circ\text{N}$  latitudes and boarder on the east shown in Figure 1a (green box). We slightly extended the eastern boundary of the Greenland Sea to the south-east, compared to its classical definition in order to include the entire area of the Odden ice tongue formation. The mass balance shows month-to-month increase or loss in sea ice volume within the Greenland Sea due to sea ice formation or melt. Positive MB values correspond to sea ice formation and negative values correspond to sea ice melt within the region. The monthly MB values were averaged over annual, winter and summer periods. Note, that due to averaging positive-negative annual values corresponding to sea ice volume loss (Fig.4) can occur due to both an increase in sea ice melt and a decrease in sea ice formation.



### 3.3 Mixed layer depth (MLD) and marginal ice zone (MIZ) ocean temperature

The MLD was derived using vertical profiles from [the ARMOR data-set](#) by the method of Dukhovskoy (Bashmachnikov et al., 2018, 2019). The method is similar to that used by Pickart et al. (2002), but is applied to the vertical profiles of [the potential density gradients](#). Before processing, the [small-scale noise in the potential density profiles](#) were filtered ~~to remove~~ [the small-scale noise out with 10-m sliding means](#). The gravitationally unstable segments were artificially mixed to neutral stratification. The MLD is defined as the depth where the vertical density gradient exceeds its two local standard deviations within a 50-m window, ~~centred~~ [centered](#) at the tested ~~point~~ [depth \(see Bashmachnikov et al. \(2018\)\)](#). The visual control shows that the results are mostly similar to the widely used methods by ~~de Boyer~~ de Boyer Montégut et al. (2004) and Kara et al. (2003), except for the weakly stratified areas, where the Dukhovskoy's method defines the MLD with higher accuracy. The ~~marginal ice zone was~~ [obtained mean distribution of the MLD, seasonal and interannual variations of the MLD in the central Greenland Sea are consistent with observations \(Våge et al., 2015; Latarius and Quadfasel, 2016; Brakstad et al., 2019\)](#).

[The position of the real MIZ strongly varies in time and along the EGC, being a function of local direction and intensity of sea ice transport by wind and current, variation in the characteristics of ice transport from the Arctic and interaction of ice floes, local ice thermodynamics, etc. Presence of melting sea ice, in turn, affects the upper ocean and air temperatures. A warmer winter ocean warms up the air, which can further be advected over the sea ice causing its melt away from the sea ice edge. Furthermore, an anomalously warmer ocean may prevent \(or delay\) formation of a new ice. All these distant factors certainly affect the MIZ position. However, if we estimate ocean temperature variations only along the actual MIZ, we do not account for these effects. The considerations above show that defining the oceanic region directly and indirectly affecting the ice volume in the sea is not straightforward. In this study we define interannual variations of ocean temperature in a fixed region, which is](#) defined as an area enclosed between the 500-m isobath (~~marking the shelf break~~), [marking the Greenland shelf break](#), and the mean winter location of the sea ice edge (Fig. 1). ~~The~~ [Using the fixed region also assures compatibility of interannual temperature variations. For the computations, the sea ice edge was defined as the 15% mean winter NSIDC sea ice concentration for 1979-2016. For brevity we further, somewhat deliberately, call this region the MIZ area. We further will see that temperature trends remain positive and of the same order of magnitude all over the western Greenland Sea, except for a few limited areas along the shelf break. This assure robustness of the results to the choice of the study region.](#)

### 3.4 Oceanic horizontal heat flux

The ARMOR data was used to derive a time series of oceanic heat flux into the Nordic Seas. Total oceanic heat flux through the ~~transect~~ [\(Q<sub>Svinøy transect</sub> \( \$Q\_{Svinøy}\$ \)\)](#) is calculated by integrating the heat flux values in the grid points:

$$Q_{iSvinøy} = \int \int [\rho * c_p * (T_i - T - T_{ref}) V_w v] dx dz \quad (6)$$

30 where  $\rho = 1030 \text{ kg m}^{-3}$  is the mean sea water density;  $c_p = 4200-3900 \text{ J kg}^{-1} \text{ }^\circ \text{C}^{-1}$  is specific heat of sea water;  $T_i - T$  is sea water temperature [in an  \$i\$ -th grid cell](#),  $T_{ref} = -1.8^\circ \text{C}$  is the “reference temperature”, ~~V is current speed~~ [v is current velocity](#) perpendicular to the transect,  ~~$d_x$  is the distance between the vertical profiles along the transect~~,  ~~$d_z$  is the thickness of the water~~



~~layer for the processed depth level.~~ The choice of the reference temperature is conditioned by study of the role of heat fluxes on melting sea ice.

## 4 Results

### 4.1 Assessment of PIOMAS-derived ice volume flux through the Fram Strait and sea ice volume in the Greenland Sea

5 In order to assess the quality of the PIOMAS data in ~~the~~-region, PIOMAS monthly effective sea ice thickness in the Greenland Sea was compared to those derived using the CS2 data-set (Fig. 2 ~~, 2~~). In general, PIOMAS ~~underestimate~~-underestimates effective sea ice thickness compared to ~~the~~-CS2 (Fig. 1b). The mean difference between PIOMAS and CS2 ~~of a grid cell values~~-grid cell value is - 0.70 m. There are only two locations where PIOMAS shows thicker ice compared to ~~the~~-CS2 – north of ~~the~~-Spitsbergen and along the sea ice edge. On the other hand, CS2 also tends to overestimate sea ice thickness in  
10 the marginal ice zone (Ricker et al., 2017). The highest absolute differences between the data sets are attributed to the areas along the Greenland coast (dark blue) and north of ~~the~~-Spitsbergen (dark red) (Fig. 1b). The monthly scatter plots (Fig. 2a-g) show that PIOMAS ~~tend to overestimates~~-tends to overestimate thin sea ice and underestimate thick sea ice thickness, which is in agreement with the tendency reported for the central Arctic ~~Schweiger et al. (2011)~~(Schweiger et al., 2011). This results in moderate correlations between the two data sets ( $0.63 < r < 0.77$ ) for all winter months. The major discrepancies correspond  
15 to sea ice of 3 m and higher thickness, which form “tails” to the lower right corner of the scatter plots (Fig. 2 a-g).

PIOMAS sea ice volume flux through the Fram Strait (October to April) was cross-compared with the ~~satellite-derived and~~  
ULS-based fluxes derived using observation-based sea ice thickness data (see Tab.1). The analysis shows that ~~ice volume fluxes~~  
in PIOMAS are PIOMAS-based sea ice volume flux is in good agreement with the estimates from other data sets (Fig. 3, Tab.  
2). The correlation coefficients between the three data sets and ~~the PIOMAS all~~ PIOMAS are over 0.6. The highest correlation  
20 off over 0.8 with the Ricker et al. (2018) data can be explained by using identical gates and methodology for estimating ice volume fluxes (Fig. 1a). However, other statistical criteria (bias, relative percentage difference (RPD), root mean square error (RMSE), Table 2) indicate somewhat stronger mismatch between the PIOMAS and Ricker et al. (2018) ~~ice volume fluxes~~  
estimates compared to those between PIOMAS and Kwok et al. (2004) or Spreen et al. (2009). The possible sources of ~~these~~  
diserepancies-this discrepancy are discussed in Sec. 5. Overall, PIOMAS shows lower sea ice volume fluxes compared to the  
25 ~~satellite- and the ULS-based~~ observation-based estimates (Fig. 3c). The interannual variations in the PIOMAS monthly and total winter sea ice volume flux agree well with other data-sets (Fig. 3a; Tab. 2) ~~until 2014, after which PIOMAS fluxes start~~  
decreasing, contrary to the results by Ricker et al. (2018). At intra-annual time scales all three data-sets show similar patterns with the minimum flux in October and maximum flux in March (Fig. 3b). Overall, moderate to high correlation between the data-sets, low relative variance and low bias (Tab. 2) suggest that PIOMAS provides a realistic estimate of seasonal and  
30 interannual variations of the winter sea ice volume flux through the Fram Strait. Figures 2h and 3c suggest that PIOMAS correctly captures year-to-year variations of the mean effective sea ice thickness in the Greenland Sea and Fram Strait sea ice volume flux. This justifies using PIOMAS for analysing interannual variations of the integral sea ice volume over the Greenland Sea.

## 4.2 Interannual variations of sea ice flux through the Fram Strait and sea ice volume in the Greenland Sea

The sea ice ~~volumes~~ volume in the Greenland Sea, derived from PIOMAS, revealed statistically significant (at 99% confidence level) negative trends in monthly winter, summer and annual values (Fig. 4a, Tab. 3). The strongest negative trend of 84.8 km<sup>3</sup> per decade or 13.5% of long-term monthly annual mean volume is observed in winter, while for summer months, the trend ~~comprises was~~ 58.2 km<sup>3</sup> per decade or 9.3% of long-term annual mean volume. The sea ice volume in the Greenland Sea shows an overall reduction by 72.4 km<sup>3</sup> or 11.5% of its long-term mean per decade.

The reduction of the sea ice volume in the Greenland Sea ~~unexpectedly goes along with an increase in the monthly ice volume flux~~ coincides with an increased sea ice volume import through the Fram Strait by 9.6 km<sup>3</sup> per decade or 8.8% of its long-term mean (significant at 90% confidence level). Thus, the total increase in the sea ice volume imported to the Greenland Sea ~~though through~~ the Fram Strait ~~comprises 112.8~~ is 115.2 km<sup>3</sup> per decade, which accounts for ~~17.8~~ 18.2% of the Greenland Sea annual mean sea ice volume. The sea ice volume flux through the Denmark Strait comprises ~~for~~ about 2% (Fig. 2–13) of that through the Fram Strait and shows no significant tendency. This flux has no ~~significantly considerable~~ effect on the sea ice mass balance of the ~~sea~~ Greenland Sea.

A balance between ~~SIV~~ sea ice volume import/export to the Greenland Sea ~~though through~~ the straits and regional changes in ~~SIV~~ the sea ice volume shows the volume of sea ice formed or lost due to thermodynamic processes within the region (Sec. 3.2). The sea ice mass balance in the Greenland Sea expressed in ~~SIV~~ sea ice volume loss is shown in Fig. 4b. ~~The SIV loss shows~~ For about a half of the years during the study period, sea ice volume loss in summer is higher than that in winter. However, there are a few years (1992, 1994, 2004–2007) when winter sea ice volume loss significantly exceeds the summer one. During these years an increased sea ice volume flux through the Fram Strait is detected (Fig. 4c). There is a positive statistically significant trends in annual and summer ~~values~~ monthly mean sea ice volume loss, while winter trend shows low statistical significance (Tab. 3). Overall, the monthly Greenland Sea ~~SIV~~ sea ice volume loss increases by 9.4 km<sup>3</sup> per decade (Fig. 4, Tab. 3).

## 4.3 Interannual variations of water temperature and MLD in the MIZ of the Greenland Sea

In order to find the reason for the opposite trends of ~~SIV in the Greenland Sea and~~ Greenland Sea sea ice volume in and sea ice volume flux ~~though through~~ the Fram Strait, we investigate water temperature in the study region (Sec. 2.3, 3.3, 3.4). A relatively warm ~~Atlantic water~~ AW is observed in the East Greenland Current (EGC), off the Greenland shelf break, below a thin upper mixed layer dominated by the cold ~~Polar water~~. ~~The Atlantic water is~~ PW. ~~Our estimates of winter MLD shows that the AW should be~~ regularly brought to the ocean surface by vertical winter mixing, which ~~intensifies in winter (Håvik et al., 2017)~~ is consistent with observations (Håvik et al., 2017; Våge et al., 2018). The presence of the ~~Atlantic water~~ AW is observed in the climatology as water temperature (and salinity) in the EGC increasing ~~southeastwards and downwards with depth~~ from about 0 °C ~~at near~~ the sea-surface to 2–4 °C at 500 m. In the 24-year means, the northern temperature maximum (Fig. 5a) results from recirculation of ~~Atlantic water~~ AW of the WSC in the southern Fram Strait, while the southern maximum is due to the northwards heat flux with the ~~West Islandie Current (WIC)~~ North Icelandic Irminger Current (NIIC) through the Denmark Strait

(Ypma et al., 2019)(Hansen et al., 2008; Ypma et al., 2019). The latter is a northern branch of the Irminger Current. The sea ice is affected by the heat in the upper mixed layer, the depth of which varies on synoptic, seasonal and interannual time scales. Our analysis shows that the obtained tendencies are largely independent from the choice of the water layer, at least within the upper 200 m of the water column. In further analysis we present results for the upper 50 m layer (the typical summer mixed layer in the MIZ) and the upper 200 m layer (the typical winter mixed layer in the MIZ, (Fig. 6c)). In the annual means, the water temperature, averaged over upper 50-m layer of the MIZ, has maximum of 2°C in September and decreases to 0.1-0.2°C in March-April. Averaged over the upper 200-m the patterns of the mean distribution and of (a somewhat weaker) tendencies in temperature and salinity closely repeat those in Figure 5. Always above the seawater freezing temperatures, the ocean melts the sea ice in the MIZ all the year-round.

Figure 5a shows interannual variations of November 2 °C sea water isotherm (averaged over the upper 200-m layer). Water temperature in November reflects the heat fluxes accumulated during the warm period. It shows the background conditions formed by the beginning of winter cooling, when sea ice start forming locally. However, the performed tests show that the tendency of the isotherm to approach the shelf break is consistent for different isotherms (from 1 to 3°C), for different layer thickness (50 to 200 m) and for different months. The difference is only observed for winter months, when the whole upper 200-m mixed layer effectively releases heat and the interannual trends become insignificant. From 1990s to 2000s the isotherm approaches 2°C isotherm approached the shelf break. The largest westwards propagation is observed in the WSC recirculation area (76-78°N) and northwest of Yan-Jan Mayen (70-73°N), in the southern Odden tongue region. The linear temperature trends trend (Fig. 5b) confirm the overall shows warming in the western and southern parts of the MIZ, whole area of the eastern MIZ. The strongest warming follows the pathway of the recirculating AW in the northern Greenland Sea (Glessmer et al., 2014; Håvik et al., 2017) which is known to strongly affect the central regions of the sea (Rudels et al., 2002; Jeansson et al. 2017). The warming in the northern Greenland Sea is linked to a stronger-strong warming of the WSC and of the Norwegian Atlantic Front Current (NwAFC), of its extension while that in the southernmost part of the sea – with the NIIC. Two exceptions can be noted: the northwestern part of the coastally trapped EGC (where negative trends are obtained in the area dominated by a colder PW outflow from the Arctic) and the WSC, as well as of the WIC. The mean upper ocean salinity (Fig. 5c) and its tendencies (Fig. 4d) confirm the increasing presence of the Atlantic water in the upper 50-m layer in the MIZ. Averaged over the upper 200-m, the typical depth of the winter mixed layer (not shown), the patterns of the mean distribution and of (a somewhat weaker) tendencies in temperature and salinity closely repeat those in Figure 5 area of the EGC recirculation into the Greenland Sea at 72-74°N extended from the continental shelf break to 8-9°W (here the tendencies in the upper ocean temperature are close to zero). The latter is the area, where the Odden ice tongue starts spreading into the Greenland Sea interior (Germe et al., 2011). The decrease of warming in these areas is consistent with a stronger sea ice/PW transport from the Arctic (Sec. 4.2).

With a stronger melting of sea ice at the seawards part of the MIZ, together with the ice volume loss, we should observe a sea ice area loss. This is consistent with Germe et al. (2011). In particular, positive water temperature trends over the eastern part of the Odden region suggest an overall decrease of the Odden formation by the end of the study period. The mean temperature trends over the Odden region (the area within the dotted line in Fig.5b) is 0.08 °C per year, i.e. there is an area-mean increase

by 1.8°C from 1993 to 2016. This exceeds the mean ocean temperature increase, averaged in the MIZ area (Eq.7), which includes the northern shelf break regions with negative temperature trends. Therefore, the estimates of the heat available for the ice melt, based on the values presented in Eq.(7), should be considered as the lower limit of the heat release within the Odden region.

5 Interannual variations of water characteristics, averaged over the upper 200-m and ~~over-in~~ the MIZ area, are shown in Figure 6. From 1993 ~~, an overall year mean increase of an overall increase of annual mean~~ temperature in the MIZ is observed, suggesting an increasing intensity of the sea ice melt. The temperature increases during all seasons, but the strongest increase is detected in autumn (by 0.5 and 0.6°C over the 24 years). The winter convection efficiently uplifts heat to the sea surface. The heat ~~is released to the atmosphere and goes to the sea ice melt, decreasing the interannual trends to insignificant (see Table 3).~~

10 ~~Therefore, from 1993, we also observe an increase of the water temperature difference from September to March accumulated in summer is mostly released during winter.~~ Figure 4d suggests that the results can be extrapolated back to, at least, 1980, as the slope of the trend lines in temperature of the advected AW for 1980-1992 is practically the same as for the period discussed above. We observe a growing difference between September and March temperatures (Fig. 6a) ~~, e.g. together with a decrease of temperature interannual trends to insignificant in winter.~~ The growing difference in temperature is observed in spite of the

15 ~~equal winter and summer trends in the heat inflow with the NwAC (see  $T_w$  and  $Q_{Swinow}$  in Tab.3).~~ Therefore, in the ~~upper MIZ region, all additional heat, accumulated in the upper 200-m layer the heat accumulated in summer is mostly released during winter~~ layer during summer, is uplifted to the sea surface by winter convection, preventing ice formation in the ice-free areas or melting the ice in the ice-covered ones.

Not only the autumn temperature increases in the MIZ, ~~but also~~ the zonal thermal gradient across the MIZ ~~nearly doubles~~

20 ~~increases 1.7 times~~ from 1993 in ~~annual mean the annual means~~ (Fig. 6 b), and ~~even stronger (2.5 times) increases nearly 4 times~~ in winter. This goes ~~together along~~ with a decrease ~~by half~~ of the annual mean distance ~~of the between the 2°C or 3°C isotherm to and~~ the shelf break (Fig. 6 ~~(d)d~~): from 120 km in 1993 to 50 km in 2016 (see also Fig.5 ~~(a)a~~). The direct result of this effect is a faster melt of the sea ice episodically advected from the MIZ eastwards by EGC filaments and mesoscale eddies (Kwok, 2000; von Appen et al., 2018). These processes can transport sea ice dozens of kilometers eastward (von Appen et al.,

25 2018). The most favourable conditions for the eddy formation ~~are~~ observed for the ~~northern winds northely winds.~~ The eddies ~~sweep sea ice and PW off and advect warm AW closer to the ice edge, resulting in increase in bottom and lateral sea ice melt~~ (Bondevik, 2011). ~~This increases the ice melt, however~~ However, a few episodic observations of the ice dynamics in the MIZ do not presently allow quantifying the importance of this effect.

The 24-year mean winter mixed layer depth (MLD) in the MIZ off the Greenland shelf vary from 120 m to 250 m with the

30 mean value around 150 m, as derived from ARMOR data-set. Averaged over the MIZ, MLD increases from the mean value of 130 m in 1993 to around 180 m in 2016 (Fig. 6c). Since the winter mixing does not reach the lower limit of the warm Atlantic water at 500-700 m, the deeper the mixing, the more heat is uplifted towards the sea-surface, melting the ice in the MIZ, ~~which is consistent with the findings of Lauvset et al. (2018).~~ The increase of MLD results from a higher upper ocean density due to increasing salinity of the ~~Atlantic water AW~~, tempered by the increasing temperature (Fig. 5b,d). Given the

35 increase in ocean temperature in the upper 200-m layer in the MIZ from 1.3°C in September 1993 to 1.8°C in September 2016

together with an increase in the mean winter MLD from 130 m in 1993 to 180 m in 2016, we can make a rough estimate of the increase (over the 24 years) in the heat released by winter MLD in the MIZ:

$$dQ = dQ_{2016} - dQ_{1993} = c_p * \rho_{water} * (2.01,8 * 180 - 1.3 * 130) * MIZarea \quad (7)$$

where  $c_p = 4200-3900 \text{ J } ^\circ\text{C}^{-1} \text{ kg}^{-1}$ ,  $\rho_{water} = 1030 \text{ kg m}^{-3}$ , the MIZ area is estimated as  $2.3 \cdot 10^{11} \text{ m}^2$ , ~~which is about 20% of the area of the Greenland Sea.~~ The computations show an additional heat release of  $2-1.5 \cdot 10^{20} \text{ J}$ , ~~if,~~ following the observed water temperature seasonal cycle, we assume that all the heat from the growing winter MLD is released at the sea-surface. If all this heat would go to melt ice in the MIZ, we get an increase in the ~~SIV sea ice volume~~ loss during winter by:

$$dV = \frac{dq dQ}{(L * \rho_{Lice})} \sim 600 \approx 500 \text{ km}^3 \quad (8)$$

where the specific heat of ice fusion  $L=3.3 \cdot 10^5 \text{ J kg}^{-1}$  and the ice density of  $\rho_{Lice} = 920 \text{ kg m}^{-3}$  (Petrich and Eicken, 2010). This far exceeds the ~~the~~ observed sea ice volume loss in the region (SIV loss monthly winter trend \* 12 month \* 24 years =  $340 \approx 200 \text{ km}^{-3}$ ) ~~of ice needed to fuse.~~ Certainly, not all heat ~~,~~ released by the upper ocean ~~in the MIZ area~~ goes to the ice melt, ~~a.~~ An unknown fraction of heat is directly transferred to the atmosphere through open water ~~and leads or,~~ ice leads or is advected away from the MIZ area by ocean currents and eddies. The sea ice melt may additionally increase haline stratification at the lower boundary of the ice, preventing ocean heat contacting with the ice cover. However, the estimates above suggest that ~~solely the on-going,~~ the autumn warming of the ~~Greenland Sea water can result in the reduction of SIV in the Greenland Sea~~ upper MIZ region, limited from below by the winter mixed layer, is able to release the amount heat far exceeding the amount, sufficient for the observed reduction of sea ice volume in the region.

## 5 Discussion

### 5.1 PIOMAS-derived trends

The revealed regional trends in sea ice volume rely on the PIOMAS model data. A comparison of interannual variations of PIOMAS regional sea ice thickness and the sea ice volume flux through the Fram Strait showed that PIOMAS estimates are in agreement with the ~~satellite-based data~~ observation-based estimates during the recent decades. However, the PIOMAS systematic overestimation of thin ice and underestimation of thick ice thickness, reported for the central Arctic, affects the ~~multiyear volume trend (Schweiger et al. 2011).~~ The authors long-term volume trend (Schweiger et al., 2011). Schweiger et al. (2011) conclude that the PIOMAS-based volume trend is lower than the actual one. Given that similar systematic errors in effective sea ice thickness are found for the Greenland Sea (Fig. 2), it is likely that the derived Greenland Sea sea ice volume trend is underestimated. The PIOMAS Fram Strait sea ice volume flux ~~appear to be lower compared to know from literature~~ can be also affected by these systematic errors. The model studies show three major positive peaks in the Fram Strait sea ice volume flux since 1979: 1981-1983, 1989-1990, 1994-1995 (Arfeuille et al., 2000; Lindsay and Zhang, 2005). The anomaly in 1989-1990 was caused by an increase in the thickness of the transported sea ice, while the anomaly in 1994-1995 was due to an intensification of southward sea ice drift (Arfeuille et al., 2000). The reduction of Arctic multiyear ice

fraction during late 1980s – early 1990s (Comiso, 2002; Rigor and Wallace, 2004; Yu et al., 2004; Maslanik et al., 2007) are in line with this finding. The sea ice volume flux through the Fram Strait derived from PIOMAS shows the peaks in 1981-1985 and 1994-1995, but does not capture the anomaly of 1989-1990 (Fig.14c). During this period there is no significant shift in the PIOMAS effective sea ice thicknesses in the Fram Strait which is likely caused by the PIOMAS systematic errors which smoothed the differences in thickness between thick and thin ice. Since 1993, the PIOMAS Fram Strait sea ice volume flux correlates well with the observation-based fluxes (Fig. 3). The main sources of relative errors between the Fram Strait volume flux estimates can be related to the different choice of methodologies, ~~sets-of-the-data~~ data-sets and gates used to derive sea ice volume fluxes (Table 1, Fig.1). Lower PIOMAS-based sea ice volume flux can be attributed to the discussed above general PIOMAS tendency to underestimate sea ice thickness. Fig. 2i–1b shows that for the entire meridional 82°N gate, which are the main gates for sea ice import to the Greenland Sea, the PIOMAS effective sea ice thickness is lower compared to the CS-2CS2 effective thickness. In addition, the NSIDC sea ice drift shows lower speed compared to the OSI SAF drift used in Ricker et al. (2018). A combination of lower drift speed with thinner ice thickness might be the reason of the largest offset (Table 2, Fig. 3) between the PIOMAS-based Fram Strait sea ice volume fluxes and those derived in Ricker et al. (2018).

## 5.2 ~~Link to the variability of ocean temperature and atmospheric forcing~~

The revealed decrease in the sea ice volume in the Greenland Sea goes in parallel with an increase in the ice volume inflow through the Fram Strait. As the sea ice volume flux through the Denmark Strait does not show any significant change, this indicates a simultaneous intensification of the processes of ice melt and reduction in sea ice formation in the sea. The latter is supported by the highest negative trends in the sea ice area (SIA) (Fig. 1, expressed in SIC trend) in the area of the Odden tongue between 73 and 77°N, which is mostly formed locally thermodynamically, at cold air temperatures (Shuchman et al., 1998; Comiso et al., 2001; Rogers and Hung, 2008). The intensification of in the sea ice melt is discussed in the following section. The interannual variations SIA were previously related with the corresponding variations in the

The interannual variations in sea ice area were previously linked to variations in air temperature (Comiso et al., 2001). The results of our paper permitted to speculate, that ocean temperature may be important in controlling Odden formation (see also Shuchman et al. (1998); Germe et al. (2011)). E.g. the reduction of Odden tongue occurrence in 2000s (Latarius and Quadfasel, 2010) might be partially driven by the increase in upper ocean heat content (Fig.5b). In this study we argue that at least the overall SIV-sea ice volume loss from 1993 to 2016 is governed by the ocean.

## 5.3 ~~Link to the variability of ocean temperature and atmospheric forcing~~

The surplus of the amount of the heat, released by the ocean at end of the study period, is almost twice of more than twice of that necessary for bringing up the observed SIV-sea ice volume loss, even when accounting for the detected increase in the SIV transport-sea ice volume import through the Fram Strait. Heat loss to the atmosphere and the neighbouring-neighboring ocean areas should uptake take up the rest of the heat. In particular, the observed increase of ocean temperature over the Greenland Sea (Fig. 5b) may be a reason for a corresponding increase in the air temperature, used for explaining negative trends in the SIA-sea ice area (Comiso et al., 2001).



The observed trends are due to both, the increase in temperature of the ~~Atlantic water~~ AW in the MIZ, as well as an increase in winter MLD in the area, ~~bringing more Atlantic water~~ bringing more AW to the surface. A significant vertical extent of the warm subsurface ~~Atlantic water later~~ AW layer, going down to 500-700 m depth (Håvik et al., 2017), results in a higher ocean heat release for a stronger mixing for the observed MLD in the MIZ. A similar mechanism was suggested for in the Nansen ~~basin~~ Basin of the Arctic Ocean, where an enhanced vertical mixing through the pycnocline is thought to decrease the ~~SIA~~ sea ice area in the basin (Ivanov and Repina, 2018).

In turn, the subsurface ~~Atlantic water~~ AW in the EGC is fed by the recirculation of the surface water of the ~~West Spitsbergen Current~~ WSC, an extension of the Norwegian Atlantic Front Current (NwAFC) and the Norwegian Atlantic Slope Current (NwASC). The recirculation is ~~through to be~~ mostly driven by eddies (Boyd and D'Asaro, 1994; Nilsen et al., 2006; Hattermann et al., 2016). The ~~detected inconsistency is due to local peculiarities in~~ interannual variations in the vertical mixing intensity ~~in local~~ between the AW, the PW and the modified AW, returning from the Arctic through the southern Fram Strait, as well as variations in ocean-atmosphere exchange ~~and a the degree of delution of the advected Atlantic water with the Polar water with its own interannual variability~~ in that area leads to interannual variability of the AW advected by the EGC into the Greenland Sea (Langehaug and Falck, 2012). All the processes intensify during highly dynamic winter conditions. Nevertheless, interannual correlation of the summer upper ocean water temperature (0-200 m), spatially averaged over the MIZ area, with that in the upper WSC is 0.8-0.9. Further south, correlation of interannual variations of the MIZ temperature with that of the NwAFC (NwASC) or with the heat flux across the ~~Svinøy~~ Svinøy section are low. Besides differences in local forcing, regional atmospheric forcing over the northwestern Barents Sea ~~regulates~~ the interannual variations of the heat re-distribution between the WSC and the Barents Sea (Lien et al., 2013), further decreasing the correlations.

Nevertheless, in a long run (during four recent decades), temperature at the WSC, the NwAFC, ~~NwSFC~~ NwASC and the heat flux across ~~Svinøy~~ Svinøy section all show positive trends (Fig. 4, 5). This is confirmed by ~~in~~ a number of studies (Alekseev et al., 2001c; Piechura and Walczowski, 2009; Beszczynska-Möller et al., 2012).

Several studies show that during the positive NAO phase ~~the~~ intensity of oceanic heat flux to the Nordic ~~seas~~ Seas increases by 50%, and the NwASC intensifies along the Scandinavian coast (Skagseth et al., 2004; Raj et al., 2018). On the other hand, the positive NAO phase drives a higher ice drift through the Fram Strait, proved to be the main driver for interannual variations of SIF to the Greenland Sea (Ricker et al., 2018). It is also noted that the positive NAO phase increases ~~of~~ the intensity of the EGC (Blindheim et al., 2000; Kwok, 2000). Finally, the link between the ~~Atlantic water~~ AW transport by the WSC and the cyclonic circulation in the Greenland Sea, related to NAO phase, is obtained from observations and numerical models (Walczowski, 2010; Chatterjee et al., 2018).

~~Summing up the results above, the positive phase of NAO intensifies the whole current system of~~ During positive NAO phase, the cyclonic atmospheric circulation over the Nordic Seas intensifies (Skagseth et al., 2008; Germe et al., 2011). This leads to stronger northerly winds along the Greenland shelf, as well as stronger southerly winds along the Norwegian coast, leading to a more intensive cyclonic oceanic circulation in the Nordic Seas (Schlichtholz and Houssais, 2011). Several regional studies, based on in situ data, demonstrate a higher intensity of oceanic transport of volume and heat along the AW path towards the Fram Strait during the positive NAO phase. Thus, the NwASC volume inflow to the Nordic Seas ~~simultaneously~~



~~intensifying sea ice flux~~ increases by 50%, as well as the oceanic heat flux (Skagseth et al., 2004, 2008; Raj et al., 2018). The link between the AW transport by the WSC, as well as of the cyclonic circulation in the Greenland Sea, and the NAO phase is also obtained from observations and numerical models (Walczowski, 2010; Chatterjee et al., 2018). Observations additionally demonstrate that the positive NAO phase drives a stronger ice drift through the Fram ~~Strat and Atlantic water Strait~~ (Vinje and Finnekåsa, 1986; Koenigk et al., 2007; Giles et al., 2011; Köhl and Serra, 2014), a stronger EGC (Blindheim et al., 2000; Kwok and a typically larger extension of Odden ice tongue (Shuchman et al., 1998; Germe et al., 2011). NAO phase is showed to be the main driver for interannual variations of sea ice volume flux to the ~~Nordic seas~~ Greenland Sea (Germe et al., 2011; Ricker et al., 2018). The simultaneous long-term (1974-1997) intensification of the ~~Atlantic water AW~~ inflow in the Nordic Seas ~~through~~ across the Faroe-Shetland ~~ridge~~ Ridge, and of eastwards advection ~~Polar Water PW~~ to the southwestern Norwegian Sea, as a response to NAO forcing has been noted in (~~Blindheim et al., 2000~~). ~~This supports our conclusions several studies~~ (see, for example, (Blindheim et al., 2000; Yashayaev and Seidov, 2015). The long-term variations in the NAO index go in parallel with those in the Atlantic Multidecadal Oscillation (AMO), at least during the latest 70 years (Yashayaev and Seidov, 2015). This suggests that the positive phase of NAO corresponds, in the long-term tendency, to the positive phase of AMO, i.e. the higher water temperature in the North Atlantic. Both tendencies lead to a higher heat fluxes into the Nordic Seas.

From the beginning of 1970s the winter NAO index is growing. From 1979 to 2016 it is mostly positive (Fig. 7), although an overall winter trend can be separated into an increase from 1979 to 1994, a rapid drop from 1995 to 1996 and an increase from 1996 to 2016. The NAO index drop ~~in~~ 1995-1996 ~~is observed as coincides with~~ a drop in ~~SIV loss and regional sea ice volume loss and a~~ decrease in the WSC water temperature (Fig.4 ~~(b,e)~~), and ~~b,d~~). This can be related to the minimum heat flux through the ~~Svinoy-Svinøy~~ section in 1994 (Fig. 4 ~~(f)~~,d). The time needed for water properties to propagate from ~~Svinoy Svinøy~~ to the Fram Strait with the NwAC is of order of 1.5-2 years (Walczowski, 2010).

Summer NAO index does not govern the interannual variations of the atmospheric system, as well as in the oceanic ones (circulation in the Nordic ~~seas Seas~~ intensifies in winter and is thought to bring more ~~Atlantic Water AW~~ to the recirculation region compared to ~~than that~~ in summer). Consistent with other studies of seasonal interannual variations of current intensity in the region, our results suggest that these are winter variations of the ~~Atlantic water AW~~ transport that bring up the interannual variations of the subsurface water temperature in the MIZ of the Greenland Sea. The decreasing summer NAO index from 1979, may be responsible for a somewhat stronger tendency in the SIV ~~decrease loss~~ in winter, compared to summer (Fig. 4 ~~(a,b)~~).

Summing up, the positive phase of NAO intensifies the whole current system of the Nordic Seas, simultaneously intensifying sea ice flux through the Fram Strait and the northward heat flux with the AW to the Nordic Seas. In this paper we demonstrated that the intensification of the AW heat inflow contributes to variations of the sea ice volume in the Greenland Sea. This supplements previous results, showing that the AW inflow dominates the oceanographic conditions over the upper Greenland Sea, except of the shelf area (e.g. (Alekseev et al., 2001b; Marnela et al., 2013).

In spite of the stronger ice melt, the upper ocean salinity in MIZ, as well as along the ~~main currents in the Greenland Sea~~EGC, as well as along the NwAC, increases during recent decades (Fig. 5(d)). We relate salinification in the MIZ area of the upper Greenland Sea to a stronger flux of the ~~Atlantic water AW~~ and more intensive winter mixing. These effects override

the additional freshwater input from the ice melt. Oppositely, during freshening of the upper Greenland Sea, the Great salinity anomaly 1966-1972, more ice ~~is was~~ observed in the MIZ region – ~~the~~ Odden ice tongue was pronounced (Rogers and Hung, 2008). This confirms the reverse relation between the sea ice ~~content extent~~ and the MIZ salinity in the Greenland Sea and their dependence on interannual variations of the intensity of the ~~Atlantic Water AW~~ advection.

- 5 Another ~~;~~ possibly not independent mechanism is linked to the intensity of the deep convection in the Greenland Sea (Fig. 17). ~~Governed~~ A more intense convection, governed by thermohaline characteristics of the upper Greenland Sea, the sea ice extent and the intensity of ocean-atmosphere heat and freshwater exchange (Marshall and Schott, 1999; Moore et al., 2015), ~~the more intense convection~~ lowers the sea-level in the Greenland Sea (Gelderloos et al., 2013; Bashmachnikov et al., 2019); ~~thus increasing~~. This in turn increases the cyclonic circulation in the region. This effect works together with NAO forcing.
- 10 Deep convection in the Greenland Sea shows a consistent increase from about 1000 m in the beginning of 1990s to about 1500-2000 m during 2008-2010, after which a certain tendency to decrease is noted (Bashmachnikov et al., 2019). The on-going increase in salinity of the upper Greenland Sea (Fig. 5(d)) during the recent decades favours ~~the deeper convection~~ deeper convection (see also Lauvset et al. (2018); Brakstad et al. (2019)). Satellite altimetry data show that, during the same period, the area-mean cyclonic vorticity over the Nordic Seas has grown by about 10%. The circulation increase is also consistent
- 15 with the detected intensification of the AMOC after its minimum in 1980s (Rahmstorf et al., 2015). However, during the latest decade a stagnation or a possible reversal of the tendency is observed (Smeed et al., 2014).

## 6 Conclusions

- Using PIOMAS sea ice volume data we derived trends in the mean annual, winter and summer sea ice volume (SIV) in the Greenland Sea and the sea ice volume flux (SIF) through the Fram Strait for 1979 to 2016. Taking into account the SIV
- 20 inflow and outflow ~~though through~~ the Fram and Denmark Straits, the thermodynamic SIV loss within the Greenland Sea was derived. It shows an increase in monthly SIV loss by 9.4 km<sup>3</sup> per decade. From 1979 to 2016 the overall SIV loss comprises ~ 270 km<sup>3</sup>, in spite of an increase ice SIF by ~ 280 km<sup>3</sup> during the same time period. However, those PIOMAS-based trends should be treated cautiously. The absence of positive anomaly in PIOMAS-based SIF in 1989-1990 indicate that the PIOMAS underestimate thickness of thick in the Fram Strait and the Greenland Sea. The biases might lead to the actual long-term SIF
- 25 trend to be weaker, while the SIV trend to be stronger.

- Our analysis of the upper ocean water properties in the marginal sea ice (MIZ) zone of the EGC, shows a notable increase of the Atlantic Water (AW) temperature below the pycnocline, as well as of winter mixed layer depth from 1993 to 2016. These changes result in a higher sea-surface heat release, providing twice the value of additional heat needed for bringing up the observed SIV loss. ~~Therefore~~ This suggests that, the long-term variations of the heat flux entering the Nordic Seas, advected
- 30 northwards with the NwAC as the ~~Atlantic Water AW~~ and, further on, with the WSC into the MIZ ~~;~~ are found to govern largely contribute the corresponding long-term SIV variations in the Greenland Sea. The analysis of marginal sea ice zone (MIZ) ocean parameters showed an increase in mixed layer depth (MIDMLD) and its temperature from 1993 to 2016. The estimated amount

of additional oceanic heat released from 1993 to 2016 surplus the amount of heat necessary for bringing up the observed SIV loss. Therefore, we state that the ~~Atlantic Water~~ AW advection into the MIZ largely contributes to the SIV loss.

~~The long-term variations of the Atlantic water transport all the way through the Frow-Shetland ridge, with the WSC and to the MIZ zone. Interannual variations between the parameters, though, do not have high correlations, governed by variations in the local forcing.~~

~~We also showed~~ We suggest that the simultaneous tendencies in the long-term increase of SIV and of the ~~Atlantic water~~ AW transport are both linked to a higher intensity of atmospheric circulation during the positive NAO phase, and, possibly, to the ~~intensity of deep convection~~ positive AMO phase, often linked to the intensification of the AMOC since the 1980s. Not being independent, both mechanisms finally lead to a decrease of SIV in the western Greenland Sea.

10 *Acknowledgements.* The research was supported by RSF, project No. 17-17-01151.

## References

- Alekseev, G., Johannessen, O., and Kovalevskii, D.: Development of convective motions under the effect of local perturbations of sea-surface density, *Izvestiya Atmospheric and Oceanic Physics*, 37, 341–350, 2001a.
- Alekseev, G. V., V., B. P., and Nagurnij, A.: Struktura termokhalinnikh polej v rajone tsiklonicheskoy tsirkulatsii i podnyatiya vod (in Russian), in: *Struktura i izmenchivost' krupnomasshtabnyh okeanologicheskikh processov i polej v Norvezhskoj energoaktivnoj zone.*, pp. 18–27, Gidrometizdat, Leningrad, 1989.
- Alekseev, G. V., Johannessen, O., and Kovalevsky, D. V.: On development of convective motions under the influence of local density perturbations on the sea surface, *Atmospheric and ocean physics.*, 37(30), 368–377, 2001b.
- Alekseev, G. V., Johannessen, O. M., Korablev, A. A., Ivanov, V. V., and Kovalevsky, D. V.: Interannual variability in water masses in the Greenland Sea and adjacent areas, *Polar Research*, 20, 201–208, <https://doi.org/https://doi.org/10.1038/ncomms2505>, 2001c.
- Arfeuille, G., Mysak, L., and Tremblay, L.-B.: Simulation of the interannual variability of the wind-driven Arctic sea-ice cover during 1958–1998, *Climate Dynamics*, 16, 107–121, 2000.
- Bashmachnikov, I., Fedorov, A., Vesman, A., Belonenko, T., Koldunov, A., and Dukhovskoy, D.: The thermohaline convection in the subpolar seas of the North Atlantic from satellite and in situ observations. Part 1: localization of the deep convection sites, *Russian/Sovremennye problemy distantsionnogo zondirovaniya Zemli iz kosmosa*, 15, 184–194, <https://doi.org/DOI:10.21046/2070-7401-2018-15-7-184-194>, 2018.
- Bashmachnikov, I., Fedorov, A., Vesman, A., Belonenko, T., and Dukhovskoy, D.: The thermohaline convection in the subpolar seas of the North Atlantic from satellite and in situ observations. Part 2: indices of intensity of deep convection, *Russian/Sovremennye problemy distantsionnogo zondirovaniya Zemli iz kosmosa*, 16, 191–201, <https://doi.org/DOI:10.21046/2070-7401-2019-16-1-191-201>, 2019.
- Beszczynska-Möller, A., Fahrbach, E., Schauer, U., and Hansen, E.: Variability in Atlantic water temperature and transport at the entrance to the Arctic Ocean, 1997–2010, *ICES Journal of Marine Science*, 69, 852–863, 2012.
- Blindheim, J., Borovkov, V., Hansen, B., Malmberg, S.-A., Turrell, W., and Østerhus, S.: Upper layer cooling and freshening in the Norwegian Sea in relation to atmospheric forcing, *Deep Sea Research Part I: Oceanographic Research Papers*, 47, 655–680, <https://doi.org/>, 2000.
- Bondevik, E.: Studies of Eddies in the Marginal Ice Zone Along the East Greenland Current Using Spaceborne Synthetic Aperture Radar (SAR), Master's thesis, The University of Bergen, 2011.
- Boyd, T. J. and D'Asaro, E. A.: Cooling of the West Spitsbergen Current: wintertime observations west of Svalbard, *Journal of Geophysical Research: Oceans*, 99, 22 597–22 618, 1994.
- Brakstad, A., Våge, K., Håvik, L., and Moore, G.: Water mass transformation in the Greenland Sea during the period 1986–2016, *Journal of Physical Oceanography*, 49, 121–140, 2019.
- Buckley, M. W. and Marshall, J.: Observations, inferences, and mechanisms of the Atlantic Meridional Overturning Circulation: A review, *Reviews of Geophysics*, 54, 5–63, 2016.
- Chatterjee, S., Raj, R. P., Bertino, L., Skagseth, Ø., Ravichandran, M., and Johannessen, O. M.: Role of Greenland Sea Gyre Circulation on Atlantic Water Temperature Variability in the Fram Strait, *Geophysical Research Letters*, 45, 8399–8406, <https://doi.org/https://doi.org/10.1029/2018GL079174>, 2018.
- Comiso, J. C.: A rapidly declining perennial sea ice cover in the Arctic, *Geophysical Research Letters*, 29, 17–1, 2002.

- Comiso, J. C.: Bootstrap Sea Ice Concentrations from Nimbus-7 SMMR and DMSP SSM/I-SSMIS, Version 2., Boulder, Colorado USA. NASA National Snow and Ice Data Center Distributed Active Archive Center, available at:<https://nsidc.org/data/nsidc-0079/>, last access: 18 September 2018, 2015.
- Comiso, J. C., Wadhams, P., Pedersen, L. T., and Gersten, R. A.: Seasonal and interannual variability of the Odden ice tongue and a study of environmental effects, *Journal of Geophysical Research: Oceans*, 106, 9093–9116, 2001.
- de Boyer Montégut, C., Madec, G., Fischer, A. S., Lazar, A., and Iudicone, D.: Mixed layer depth over the global ocean: An examination of profile data and a profile-based climatology, *Journal of Geophysical Research: Oceans*, 109, 2004.
- Gelderloos, R., Katsman, C., and Våge, K.: Detecting Labrador sea water formation from space, *Journal of Geophysical Research: Oceans*, 118, 2074–2086, <https://doi.org/>, 2013.
- 10 Germe, A., Houssais, M.-N., Herbaut, C., and Cassou, C.: Greenland Sea sea ice variability over 1979–2007 and its link to the surface atmosphere, *Journal of Geophysical Research: Oceans*, 116, 2011.
- Giles, K., Laxon, S., Ridout, A., Wingham, D., and Bacon, S.: The wind driven spin-up of the Beaufort Gyre from satellite radar altimetry, in: AGU Fall Meeting Abstracts, 2011.
- Glessmer, M. S., Eldevik, T., Våge, K., Nilsen, J. E. Ø., and Behrens, E.: Atlantic origin of observed and modelled freshwater anomalies in the Nordic Seas, *Nature Geoscience*, 7, 801, 2014.
- 15 Grosfeld, K., Treffeisen, R., Asseng, J., Bartsch, A., Bräuer, B., Fritsch, B., Gerdes, R., Hendricks, S., Hiller, W., Heygster, G., et al.: Online sea-ice knowledge and data platform< [www.meereisportal.de](http://www.meereisportal.de), *Polarforschung*, 85, 143–155, 2016.
- Guinehut, S., Dhomp, A.-L., Larnicol, G., and Traon, P.-Y. L.: High resolution 3-D temperature and salinity fields derived from in situ and satellite observations, *Ocean Science*, 8, 845–857, <https://doi.org/>, 2012.
- 20 Hansen, B., Østerhus, S., Turrell, W. R., Jónsson, S., Valdimarsson, H., Hátún, H., and Olsen, S. M.: The inflow of Atlantic water, heat, and salt to the nordic seas across the Greenland–Scotland ridge, in: *Arctic–Subarctic Ocean Fluxes*, pp. 15–43, Springer, 2008.
- Hattermann, T., Isachsen, P. E., von Appen, W.-J., Albretsen, J., and Sundfjord, A.: Eddy-driven recirculation of Atlantic water in Fram Strait, *Geophysical Research Letters*, 43, 3406–3414, <https://doi.org/doi:10.1002/2016GL068323>, 2016.
- Håvik, L., Pickart, R. S., Våge, K., Torres, D., Thurnherr, A. M., Beszczynska-Möller, A., Walczowski, W., and von Appen, W.-J.: Evolution of the East Greenland current from Fram Strait to Denmark strait: synoptic measurements from summer 2012, *Journal of Geophysical Research: Oceans*, 122, 1974–1994, 2017.
- 25 Hendricks, S., Ricker, R., and Helm, V.: User Guide-AWI CryoSat-2 Sea Ice Thickness Data Product (v1. 2), 2016.
- Ivanov, V. and Repina, I.: The Effect of Seasonal Variability on the State of the Arctic Sea Ice Cover, *Izvestiya rossiyskoy akademii nauk. Fizika atmosfery i okeana*, 54, 73–82, <https://doi.org/DOI:10.7868/S0003351518010087>, 2018.
- 30 Jeansson, E., Jutterström, S., Rudels, B., Anderson, L. G., Olsson, K. A., Jones, E. P., Smethie Jr, W. M., and Swift, J. H.: Sources to the East Greenland Current and its contribution to the Denmark Strait Overflow, *Progress in Oceanography*, 78, 12–28, 2008.
- Jeansson, E., Olsen, A., and Jutterström, S.: Arctic intermediate water in the Nordic Seas, 1991–2009, *Deep Sea Research Part I: Oceanographic Research Papers*, 128, 82–97, 2017.
- Kara, A. B., Rochford, P. A., and Hurlburt, H. E.: Mixed layer depth variability over the global ocean, *Journal of Geophysical Research: Oceans*, 108, 2003.
- 35 Kern, S., Kaleschke, L., and Spreen, G.: Climatology of the Nordic (Irminger, Greenland, Barents, Kara and White/Pechora) Seas ice cover based on 85 GHz satellite microwave radiometry: 1992–2008, *Tellus A*, 62, 411–434, 2010.

- Koenigk, T., Mikolajewicz, U., Haak, H., and Jungclaus, J.: Arctic freshwater export in the 20th and 21st centuries, *Journal of Geophysical Research: Biogeosciences*, 112, 2007.
- Köhl, A. and Serra, N.: Causes of decadal changes of the freshwater content in the Arctic Ocean, *Journal of Climate*, 27, 3461–3475, 2014.
- Korablev, A., Pnyushkov, A., and Smirnov, A.: Compiling of the oceanographic database for climate monitoring in the Nordic Seas, *Russian/Trudy AARI*, 447, 85–108, 2007.
- 5 Kwok, R.: Recent changes in Arctic Ocean sea ice motion associated with the North Atlantic Oscillation, *Geophysical Research Letters*, 27, 775–778, 2000.
- Kwok, R. and Rothrock, D. A.: Variability of Fram Strait ice flux and North Atlantic Oscillation, *Journal of Geophysical Research: Oceans*, 104, 5177–5189, <https://doi.org/10.1029/1998JC900103>, <https://agupubs.onlinelibrary.wiley.com/doi/abs/10.1029/1998JC900103>, 1999.
- 10 Kwok, R., Cunningham, G., and Pang, S.: Fram Strait sea ice outflow, *Journal of Geophysical Research: Oceans*, 109, 2004.
- Langehaug, H. R. and Falck, E.: Changes in the properties and distribution of the intermediate and deep waters in the Fram Strait, *Progress in Oceanography*, 96, 57–76, 2012.
- Latarius, K. and Quadfasel, D.: Seasonal to inter-annual variability of temperature and salinity in the Greenland Sea Gyre: heat and freshwater budgets, *Tellus A: Dynamic Meteorology and Oceanography*, 62, 497–515, 2010.
- 15 Latarius, K. and Quadfasel, D.: Water mass transformation in the deep basins of the Nordic Seas: Analyses of heat and freshwater budgets, *Deep Sea Research Part I: Oceanographic Research Papers*, 114, 23–42, 2016.
- Lauvset, S. K., Brakstad, A., Våge, K., Olsen, A., Jeansson, E., and Mork, K. A.: Continued warming, salinification and oxygenation of the Greenland Sea gyre, *Tellus A: Dynamic Meteorology and Oceanography*, 70, 1–9, 2018.
- Lien, V. S., Vikebø, F. B., and Skagseth, Ø.: One mechanism contributing to co-variability of the Atlantic inflow branches to the Arctic, *Nature Communications*, 4, 1488, <https://doi.org/->, 2013.
- 20 Lindsay, R. and Zhang, J.: The thinning of Arctic sea ice, 1988–2003: Have we passed a tipping point?, *Journal of Climate*, 18, 4879–4894, 2005.
- Marnela, M., Rudels, B., Houssais, M.-N., Beszczynska-Möller, A., Eriksson, P., et al.: Recirculation in the Fram Strait and transports of water in and north of the Fram Strait derived from CTD data, *Ocean Science*, 2013.
- 25 Marshall, J. and Schott, F.: Open-ocean convection: Observations, theory, and models, *Reviews of Geophysics*, 37, 1–64, 1999.
- Marshall, J., Kushnir, Y., Battisti, D., Chang, P., Czaja, A., Dickson, R., Hurrell, J., McCartney, M., Saravanan, R., and Visbeck, M.: North Atlantic climate variability: phenomena, impacts and mechanisms, *International journal of climatology*, 21, 1863–1898, 2001.
- Maslanik, J., Fowler, C., Stroeve, J., Drobot, S., Zwally, J., Yi, D., and Emery, W.: A younger, thinner Arctic ice cover: Increased potential for rapid, extensive sea-ice loss, *Geophysical Research Letters*, 34, 2007.
- 30 Meincke, J., Jonsson, S., and Swift, J. H.: Variability of convective conditions in the Greenland Sea, in: *ICES Mar. Sci. Symp*, vol. 195, pp. 32–39, 1992.
- Moore, G. W. K., Våge, K., Pickart, R. S., and Renfrew, I. A.: Decreasing intensity of open-ocean convection in the Greenland and Iceland seas, *Nature Climate Change*, 5, 877, <https://doi.org/https://doi.org/10.1038/nclimate2688>, 2015.
- Moretskij, V. N. and Popov, A.: Vodnye massy Norvezhskogo i Grenlandskogo morej i osnovnye tipy vertikalnojoj stuktury vod (in Russian), in: *Struktura i izmenchivost' krupnomasshtabnyh okeanologicheskikh processov i polej v Norvezhskoj energoaktivnoj zone.*, pp. 18–27, Gidrometizdat, Leningrad, 1989.
- Mulet, S., Rio, M.-H., Mignot, A., Guinehut, S., and Morrow, R.: A new estimate of the global 3D geostrophic ocean circulation based on satellite data and in-situ measurements, *Deep Sea Research Part II: Topical Studies in Oceanography*, 77, 70–81, 2012.

- Nilsen, F., Gjevik, B., and Schauer, U.: Cooling of the West Spitsbergen Current: Isopycnal diffusion by topographic vorticity waves, *Journal of Geophysical Research: Oceans*, 111, 2006.
- Onarheim, I. H., Eldevik, T., Smedsrud, L. H., and Stroeve, J. C.: Seasonal and regional manifestation of Arctic sea ice loss, *Journal of Climate*, 31, 4917–4932, 2018.
- 5 Peterson, B. J., McClelland, J., Curry, R., Holmes, R. M., Walsh, J. E., and Aagaard, K.: Trajectory shifts in the Arctic and subarctic freshwater cycle, *Science*, 313, 1061–1066, 2006.
- Petrich, C. and Eicken, H.: Growth, structure and properties of sea ice, *Sea ice*, 2, 23–77, 2010.
- Pickart, R. S., Torres, D. J., and Clarke, R. A.: Hydrography of the Labrador Sea during active convection, *Journal of Physical Oceanography*, 32, 428–457, 2002.
- 10 Piechura, J. and Walczowski, W.: Warming of the West Spitsbergen Current and sea ice north of Svalbard, *Oceanologia*, 51, 147–164, <https://doi.org/https://doi.org/10.5697/oc.51-2.147>, 2009.
- Rahmstorf, S., Box, J. E., Feulner, G., Mann, M. E., Robinson, A., Rutherford, S., and Schaffernicht, E. J.: Exceptional twentieth-century slowdown in Atlantic Ocean overturning circulation, *Nature climate change*, 5, 475, <https://doi.org/https://doi.org/10.1038/nclimate2554>, 2015.
- 15 Raj, R. P., Nilsen, J. Ø., Johannessen, J., Furevik, T., Andersen, O., and Bertino, L.: Quantifying Atlantic Water transport to the Nordic Seas by remote sensing, *Remote Sensing of Environment*, 216, 758–769, <https://doi.org/https://doi.org/10.1016/j.rse.2018.04.055>, 2018.
- Rhein, M., Kieke, D., Hüttl-Kabus, S., Roessler, A., Mertens, C., Meissner, R., Klein, B., Böning, C. W., and Yashayaev, I.: Deep water formation, the subpolar gyre, and the meridional overturning circulation in the subpolar North Atlantic, *Deep Sea Research Part II: Topical Studies in Oceanography*, 58, 1819–1832, <https://doi.org/https://doi.org/10.1016/j.dsr2.2010.10.061>, 2011.
- 20 Rhein, M., Kieke, D., and Steinfeldt, R.: Advection of North Atlantic Deep Water from the Labrador Sea to the southern hemisphere, *Journal of Geophysical Research: Oceans*, 120, 2471–2487, 2015.
- Ricker, R., Hendricks, S., Helm, V., Skourup, H., and Davidson, M.: Sensitivity of CryoSat-2 Arctic sea-ice freeboard and thickness on radar-waveform interpretation, *The Cryosphere*, 8, 1607–1622, 2014.
- Ricker, R., Hendricks, S., Kaleschke, L., Tian-Kunze, X., King, J., and Haas, C.: A weekly Arctic sea-ice thickness data record from merged
- 25 CryoSat-2 and SMOS satellite data, *Cryosphere*, 11, 1607–1623, 2017.
- Ricker, R., Girard-Ardhuin, F., Krumpen, T., and Lique, C.: Satellite-derived sea ice export and its impact on Arctic ice mass balance, *The Cryosphere*, 12, 3017–3032, 2018.
- Rigor, I. G. and Wallace, J. M.: Variations in the age of Arctic sea-ice and summer sea-ice extent, *Geophysical Research Letters*, 31, 2004.
- Rogers, J. C. and Hung, M.-P.: The Odden ice feature of the Greenland Sea and its association with atmospheric pressure, wind, and surface
- 30 flux variability from reanalyses, *Geophysical Research Letters*, 35, 2008.
- Rudels, B., Fahrbach, E., Meincke, J., Budéus, G., and Eriksson, P.: The East Greenland Current and its contribution to the Denmark Strait overflow, *ICES Journal of Marine Science*, 59, 1133–1154, 2002.
- Schlichtholz, P. and Houssais, M.-N.: Forcing of oceanic heat anomalies by air-sea interactions in the Nordic Seas area, *Journal of Geophysical Research: Oceans*, 116, 2011.
- 35 Schweiger, A., Lindsay, R., Zhang, J., Steele, M., Stern, H., and Kwok, R.: Uncertainty in modeled Arctic sea ice volume, *Journal of Geophysical Research: Oceans*, 116, 2011.



- Serreze, M. C., Barrett, A. P., Slater, A. G., Woodgate, R. A., Aagaard, K., Lammers, R. B., Steele, M., Moritz, R., Meredith, M., and Lee, C. M.: The large-scale freshwater cycle of the Arctic, *Journal of Geophysical Research: Oceans*, 111, 2006.
- Shuchman, R. A., Josberger, E. G., Russel, C. A., Fischer, K. W., Johannessen, O. M., Johannessen, J., and Gloersen, P.: Greenland Sea Odden sea ice feature: Intra-annual and interannual variability, *Journal of Geophysical Research: Oceans*, 103, 12 709–12 724, 1998.
- Skagseth, Ø., Orvik, K. A., and Furevik, T.: Coherent variability of the Norwegian Atlantic Slope Current derived from TOPEX/ERS altimeter data, *Geophysical Research Letters*, 31, <https://doi.org/10.1029/2004GL020057>, 2004.
- Skagseth, Ø., Furevik, T., Ingvaldsen, R., Loeng, H., Mork, K. A., Orvik, K. A., and Ozhigin, V.: Volume and heat transports to the Arctic Ocean via the Norwegian and Barents Seas, in: *Arctic–Subarctic Ocean Fluxes*, pp. 45–64, Springer, 2008.
- Smedsrud, L. H., Halvorsen, M. H., Stroeve, J. C., Zhang, R., and Kloster, K.: Fram Strait sea ice export variability and September Arctic sea ice extent over the last 80 years, *The Cryosphere*, 11, 65–79, 2017.
- Smeed, D., McCarthy, G., Cunningham, S., Frajka-Williams, E., Rayner, D., Johns, W. E., Meinen, C., Baringer, M., Moat, B., Duchez, A., et al.: Observed decline of the Atlantic meridional overturning circulation 2004–2012, *Ocean Science*, 10, 29–38, 2014.
- Spreen, G., Kern, S., Stammer, D., and Hansen, E.: Fram Strait sea ice volume export estimated between 2003 and 2008 from satellite data, *Geophysical Research Letters*, 36, 2009.
- Sumata, H., Lavergne, T., Girard-Arduin, F., Kimura, N., Tschudi, M. A., Kauker, F., Karcher, M., and Gerdes, R.: An intercomparison of Arctic ice drift products to deduce uncertainty estimates, *Journal of Geophysical Research: Oceans*, 119, 4887–4921, 2014.
- Sumata, H., Gerdes, R., Kauker, F., and Karcher, M.: Empirical error functions for monthly mean Arctic sea-ice drift, *Journal of Geophysical Research: Oceans*, 120, 7450–7475, 2015.
- Tschudi, M., W. N. M. J. S. S. C. F. and Maslanik, J.: Polar Pathfinder Daily 25 km EASE-Grid Sea Ice Motion Vectors, Version 3, Boulder, Colorado USA. NASA National Snow and Ice Data Center Distributed Active Archive Center, available at:<https://nsidc.org/data/nsidc-0116/versions/3>, last access: 18 September 2018, 2016.
- Våge, K., Moore, G. W. K., Jónsson, S., and Valdimarsson, H.: Water mass transformation in the Iceland Sea, *Deep Sea Research Part I: Oceanographic Research Papers*, 101, 98–109, 2015.
- Våge, K., Papritz, L., Håvik, L., Spall, M. A., and Moore, G. W. K.: Ocean convection linked to the recent ice edge retreat along east Greenland, *Nature communications*, 9, 1287, 2018.
- Vinje, T. and Finnekåsa, Ø.: The ice transport through the Fram Strait, 1986.
- Vinje, T., Nordlund, N., and Kvambekk, Å.: Monitoring ice thickness in Fram Strait, *Journal of Geophysical Research: Oceans*, 103, 10 437–10 449, 1998.
- Visbeck, M., Fischer, J., and Schott, F.: Preconditioning the Greenland Sea for deep convection: Ice formation and ice drift, *Journal of Geophysical Research: Oceans*, 100, 18 489–18 502, 1995.
- von Appen, W.-J., Wekerle, C., Hehemann, L., Schourup-Kristensen, V., Konrad, C., and Iversen, M. H.: Observations of a Submesoscale Cyclonic Filament in the Marginal Ice Zone, *Geophysical Research Letters*, 45, 6141–6149, <https://doi.org/10.1029/2018GL077897>, <https://agupubs.onlinelibrary.wiley.com/doi/abs/10.1029/2018GL077897>, 2018.
- Wadhams, P., Comiso, J., Prussen, E., Wells, S., Brandon, M., Aldworth, E., Viehoff, T., Allegrino, R., and Crane, D.: The development of the Odden ice tongue in the Greenland Sea during winter 1993 from remote sensing and field observations, *Journal of Geophysical Research: Oceans*, 101, 18 213–18 235, 1996.

- Walczowski, W.: Atlantic Water in the Nordic Seas—properties, variability, climatic significance, *OCEANOLOGIA*, 52, 325–327, <https://doi.org/doi:10.1007/978-3-319-01279-7>, 2010.
- Warren, S. G., Rigor, I. G., Untersteiner, N., Radionov, V. F., Bryazgin, N. N., Aleksandrov, Y. I., and Colony, R.: Snow depth on Arctic sea ice, *Journal of Climate*, 12, 1814–1829, 1999.
- 5 Wu, B., Wang, J., and Walsh, J. E.: Dipole anomaly in the winter Arctic atmosphere and its association with sea ice motion, *Journal of Climate*, 19, 210–225, 2006.
- Yashayaev, I.: Hydrographic changes in the Labrador Sea, 1960–2005, *Progress in Oceanography*, 73, 242–276, 2007.
- Yashayaev, I. and Seidov, D.: The role of the Atlantic Water in multidecadal ocean variability in the Nordic and Barents Seas, *Progress in oceanography*, 132, 68–127, 2015.
- 10 Ypma, S., Brüggemann, N., Georgiou, S., Spence, P., Dijkstra, H., Pietrzak, J., and Katsman, C.: Pathways and watermass transformation of Atlantic Water entering the Nordic Seas through Denmark Strait in two high resolution ocean models, *Deep Sea Research Part I: Oceanographic Research Papers*, <https://doi.org/https://doi.org/10.1016/j.dsr.2019.02.002>, 2019.
- Yu, Y., Maykut, G., and Rothrock, D.: Changes in the thickness distribution of Arctic sea ice between 1958–1970 and 1993–1997, *Journal of Geophysical Research: Oceans*, 109, 2004.
- 15 Zhang, J. and Rothrock, D.: Modeling global sea ice with a thickness and enthalpy distribution model in generalized curvilinear coordinates, *Monthly Weather Review*, 131, 845–861, 2003.

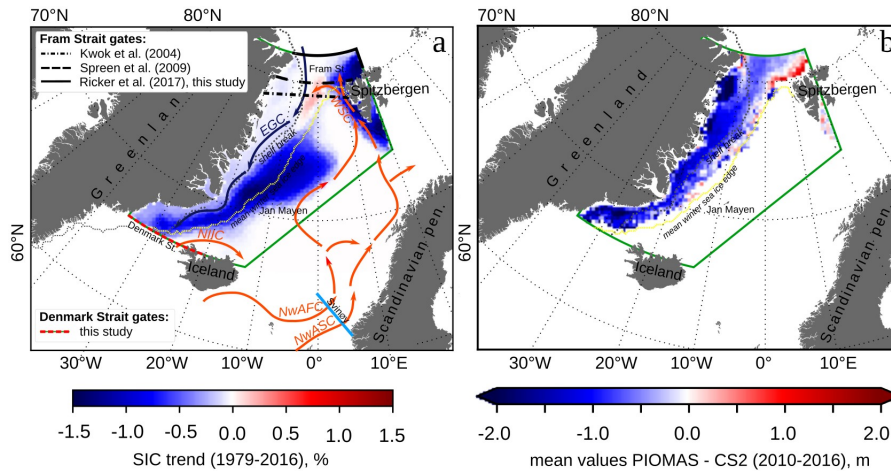

**Figure 1.** The study region is marked with the **red-green** box: a - linear trends in the mean **September-April-October-April** NSIDC sea ice concentration (SIC) over the period 1979-2016 ([Comiso, 2015](#)). The black lines show gates used for estimation of the sea ice volume flux through the Fram Strait. Mean winter sea ice edge is shown in dash yellow, the shelfbreak (500-m **isobath**) is shown in dash grey. EGC is the East Greenland Current, **WIC-NIIC** – the **West-Islandic-North Icelandic Irminger** Current, NwAFC – the Norwegian Atlantic Front Current, NwASC – the Norwegian Atlantic Slope Current, WSC – the West Spitsbergen Current; b - **mean** difference between mean PIOMAS and CS2 effective **sea** ice thickness (m) **for October- April, 2010-2016**.

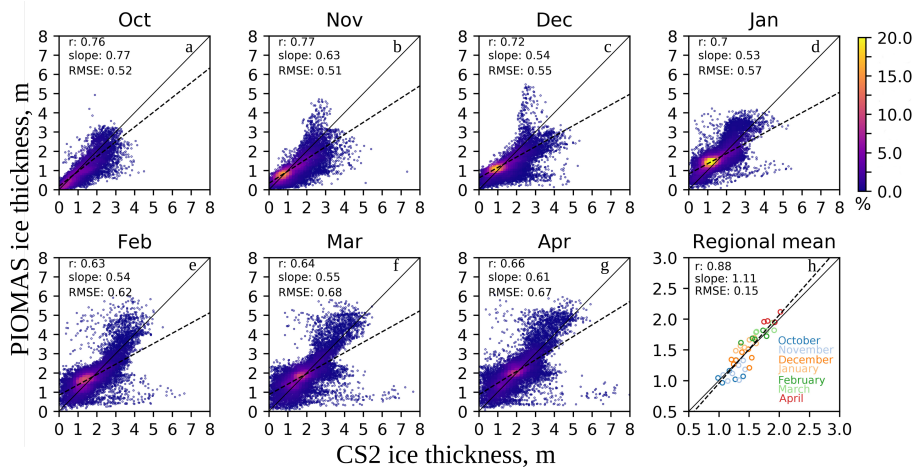

**Figure 2.** Scatter-Density scatter plots of PIOMAS and CS2 monthly effective sea ice thickness (m) in the Greenland Sea, October-April 2010-2016: (a-g) - each point corresponds to one grid-cell sea ice thickness; (h) area-mean-monthly sea ice thickness over the ice covered area of the Greenland Sea; (i) - difference between mean PIOMAS and CS2 effective ice thickness (m) for all inter-compared snapshots. The color of the points in panel h corresponds to the color of the months from October to April (2010-2016) at panels a-g a month. The dashed lines show the linear regression fit and the solid lines are 45° angles. The correlation coefficients (r) and the slope of the linear regressions and the root-mean-square error (RMSE) are given in the upper left corner.

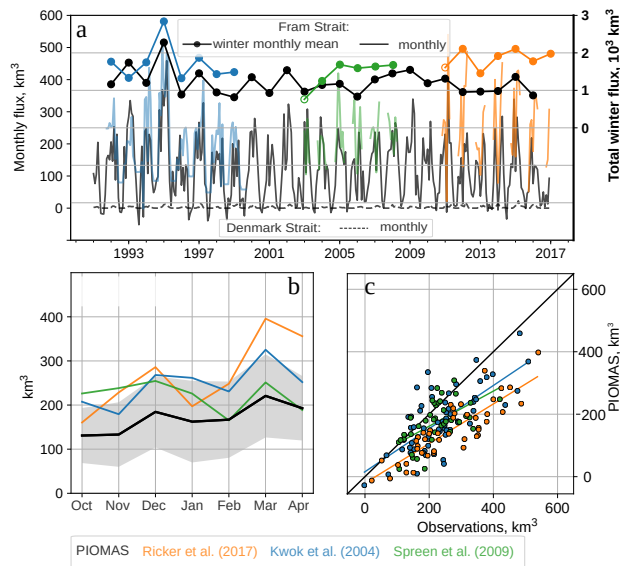

**Figure 3.** Sea ice volume fluxes ( $\text{km}^3$ ): a - time series of PIOMAS and satellite-based-observation-based monthly sea ice volume fluxes ( $\text{km}^3$ ) through the Fram and the Denmark Straits, 1991-2017-1991-2016 (note that the mean-total winter fluxes are referenced to the right scale). Empty circles indicate seasons with an incomplete winter cycle: b - winter intra-annual cycle sea ice volume flux through the Fram Strait, averaged over the period of the observations and over 1991-2016 for PIOMAS data-set. The dash-lines (satellite-estimates) and the gray background color (PIOMAS) correspond to one standard deviation interval from the PIOMAS mean; c - scatter diagram of monthly mean PIOMAS sea ice volume fluxes through the Fram Strait versus monthly mean observations.

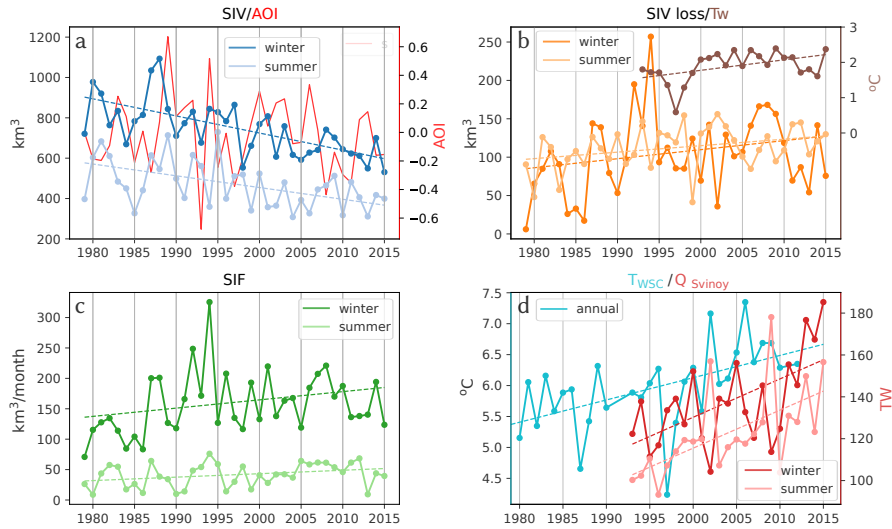

**Figure 4.** Time series of winter means (December-April) and summer means (May-November) and annual ice-ocean-atmosphere characteristics in the Greenland Sea: (a) monthly mean PIOMAS sea ice volume (SIV,  $\text{km}^3$ ) and monthly summer AO index (AOI), (b) monthly mean PIOMAS sea ice volume loss (SIV loss,  $\text{km}^3$ ) and mean September water temperature in MIZ ( $T_w, ^\circ\text{C}$ ), (c) monthly mean sea ice volume flux through the Fram Strait (SIF,  $\text{km}^3/\text{month}$ ) (d) annual means of mean water temperature in the West Spitsbergen Current ( $T_{wsc}$ ,  $^\circ\text{C}/\text{year}$ ) and monthly mean ocean heat flux ( $Q_{Svinoy}$ , TW) through Svinoy-Svinøy section (see Fig. 1).

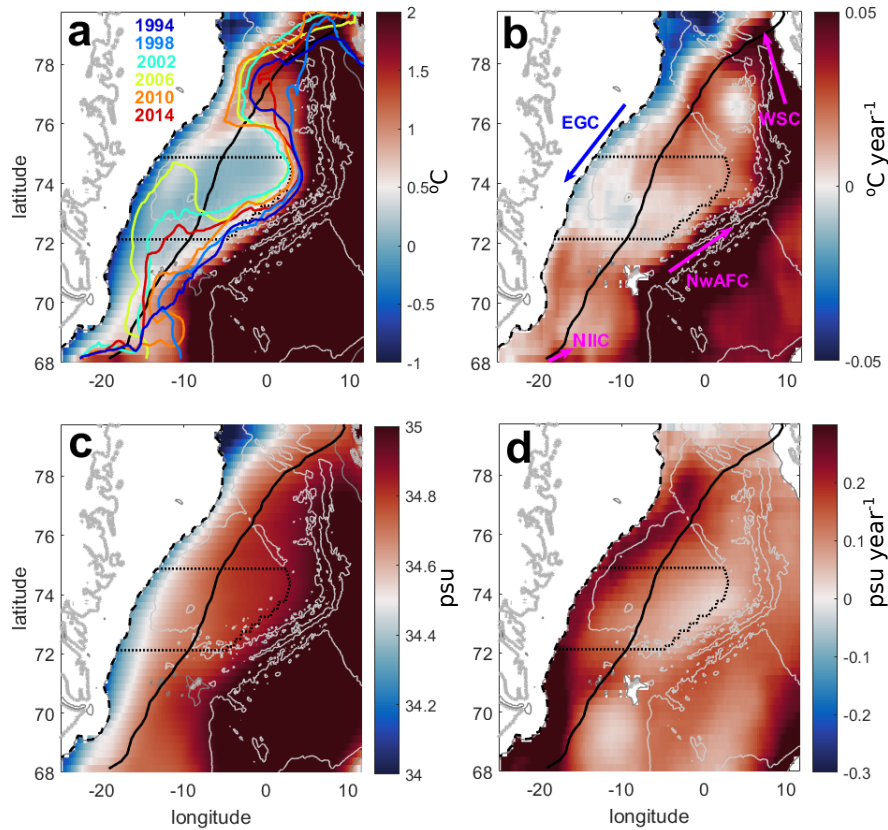

**Figure 5.** Marginal sea ice zone (enclosed in black lines) and themohaline water properties averaged in the upper 50-m layer during cold season (October-April). a - time-mean (1993-2016) temperature ( $^{\circ}\text{C}$ ) in MIZ and location of  $2^{\circ}\text{C}$  isotherm in November for selected years; b - linear **change-in-temperature trend** ( $^{\circ}\text{C year}^{-1}$ ) in the upper 50 m-layer from 1993 to 2016; c - time-mean (1993-2016) salinity in MIZ; d) linear **change-in-salinity trend** in the upper 50-m layer from 1993 to 2016. In plate (b) EGC is the East Greenland Current, **WIC-NwAFC** – the **West-Islandic-Norwegian Atlantic Front** Current, **NwAFC-NIIC** – the **Norwegian-Atlantic-Front-North Icelandic Irminger** Current, WSC – the West Spitsbergen Current. Dotted lines in panels (b) and (d) mark the region, where Odden tongue is observed.



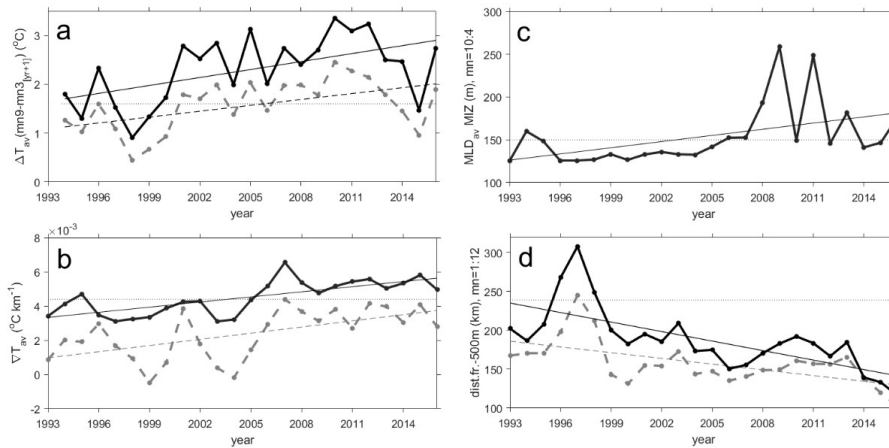

**Figure 6.** Interannual variations of water properties, averaged over the 200-m layer and the MIZ area. (a) Temperature drop ( $^{\circ}\text{C}$ ) from maximum in September to minimum in March-April next year; (b) annual mean temperature gradient across the MIZ ( $^{\circ}\text{C km}^{-1}$ ); (c) the mixed layer depth (m), averaged over the cold season; (d) annual mean distance of the  $3^{\circ}\text{C}$  isotherm from the shelf break (km). In panels (a), (b) and (d) solid black line – data averaged over the upper 50-m layer, dashed gray line – over the upper 200-m layer. In panel (d)  $3^{\circ}\text{C}$  isotherm is shown for the 50-m means and  $2^{\circ}\text{C}$  – for the 200-m means.

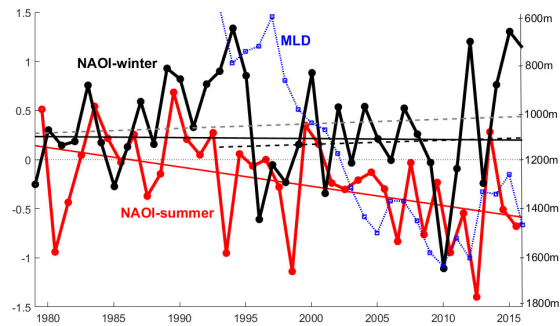

**Figure 7.** Cold season [NAOI-NAO index](#) (black, November-April) and warm season [NAOI-NAO index](#) (red, May-October) with linear trends; ~~normalized~~. Additionally plotted are the trends of cold season [NAO index since 1993](#) (black dashed line, October-April) and for [winter season](#) (gray dashed line, January-April). The blue line shows maximum MLD in the Greenland Sea derived from ARMOR data-set (see Bashmachnikov et al. (2019) for details).

**Table 11.** The list of data sources used for estimates of sea ice volume flux through the Fram Strait: sea ice concentrations (SIC), sea ice thicknesses (SIT), sea ice drift velocities (SID) and the time periods of the estimates.

| Study                | SIC                                | SIT           | SID                                    | Period    |
|----------------------|------------------------------------|---------------|----------------------------------------|-----------|
| Kwok et al. (2004)   | ULS moorings                       | ULS moorings  | Kwok and Rothrock (1999)               | 1991-2002 |
| Spreen et al. (2009) | ASI AMSR-E                         | ICESat        | IFREMER                                | 2003-2008 |
| Ricker et al. (2018) | OSI SAF SIC + sea ice type product | AWI Cryosat-2 | OSI SAF                                | 2010-2017 |
| this study           | -                                  | PIOMAS        | NSIDC Pathfinder <a href="#">v2-v3</a> | 1979-2017 |

**Table 12.** Statistics of monthly PIOMAS versus satellite-based estimates of the sea ice volume fluxes through the Fram Strait: Pearson correlation coefficient (cor. coef), variance relative to PIOMAS (var. rel.), bias, relative percentage difference (RPD), root mean square error (RMSE).

| Study                | cor.coef. | mean slope | var. rel.,% | bias | RPD,% | RMSE,km <sup>3</sup> |
|----------------------|-----------|------------|-------------|------|-------|----------------------|
| Kwok et al. (2004)   | 0.70      | 0.71       | 98          | 47   | 66    | 75                   |
| Spreen et al. (2009) | 0.60      | 0.61       | 97          | 33   | 45    | 56                   |
| Ricker et al. (2018) | 0.84      | 0.66       | 162         | 107  | 88    | 108                  |

$$\text{var. rel.,\%} = (100\% * \text{var}_{obs}) / \text{var}_{PIOMAS}$$

$$\text{bias} = \text{obs.} - \text{PIOMAS}$$

**Table 13.** Trends in monthly mean characteristics in the Greenland Sea calculated over annual (September-August), winter (October-April) and summer (~~March-September~~May-September) periods: sea ice volume (SIV, km<sup>3</sup> /year<sup>-1</sup>), sea ice volume loss (SIV loss, km<sup>3</sup> /year<sup>-1</sup>), sea ice flux ~~through~~through the Fram Strait (SIF Fram, km<sup>3</sup> /year<sup>-1</sup>), water temperature in MIZ (Tw, °C /year<sup>-1</sup>) and in the West Spitsbergen Current (TWSC, °C /year<sup>-1</sup>), heat flux across the ~~Svinoy-Svinøy~~Svinoy-Svinøy section ( $Q_{Svinoy}$ , TW /year<sup>-1</sup>).  $r^2$  - coefficient of determination, STD - standard deviation (m), p-value - probability value.

| parameter                                                        | season | trend          | $r^2$ | STD   | p-value |
|------------------------------------------------------------------|--------|----------------|-------|-------|---------|
| SIV, km <sup>3</sup> year <sup>-1</sup>                          | annual | -7.24 (-1.15%) | 0.42  | 1.48  | <0.01   |
|                                                                  | winter | -8.48 (-1.35%) | 0.44  | 1.66  | <0.01   |
|                                                                  | summer | -5.82 (-0.93%) | 0.26  | 1.72  | <0.01   |
| SIV loss, km <sup>3</sup> year <sup>-1</sup>                     | annual | 0.94 (0.88%)   | 0.09  | 0.52  | 0.08    |
|                                                                  | winter | 1.18 (1.10%)   | 0.06  | 0.83  | 0.17    |
|                                                                  | summer | 0.84 (0.79%)   | 0.10  | 0.45  | 0.07    |
| SIF Fram, km <sup>3</sup> month <sup>-1</sup> year <sup>-1</sup> | annual | 0.96 (0.88%)   | 0.09  | 0.53  | 0.08    |
|                                                                  | winter | 1.36 (1.25%)   | 0.08  | 0.82  | 0.10    |
|                                                                  | summer | 0.56 (0.52%)   | 0.09  | 0.32  | 0.08    |
| Tw, °C year <sup>-1</sup>                                        | annual | 0.015 (1.50%)  | 0.23  | 0.007 | 0.04    |
|                                                                  | winter | 0.008 (0.01%)  | 0.05  | 0.007 | 0.29    |
|                                                                  | summer | 0.026 (3.00%)  | 0.29  | 0.008 | <0.01   |
| $Q_{Svinoy}$ , TW year <sup>-1</sup>                             | annual | 1.84 (1.39%)   | 0.48  | 0.41  | <0.01   |
|                                                                  | winter | 1.83 (1.38%)   | 0.35  | 0.54  | <0.01   |
|                                                                  | summer | 1.82 (1.37%)   | 0.36  | 0.53  | <0.01   |
| $T_{WSC}$ , °C / <del>year</del> <u>year</u> <sup>-1</sup>       | annual | 0.036 (0.60%)  | 0.30  | 0.30  | <0.01   |
